1

2

3

4

5

6

## **Automatic mapping of multiplexed social receptive fields**

7

## **by deep learning and GPU-accelerated 3D videography**

8

9

10

Christian L. Ebbesen<sup>1,2,\*</sup> & Robert C. Froemke<sup>1,2,\*</sup>

11

12

13

14 <sup>1</sup> Skirball Institute of Biomolecular Medicine, Neuroscience Institute, Departments of Otolaryngology,

15 Neuroscience and Physiology, New York University School of Medicine, New York, NY, 10016, USA.

16 <sup>2</sup> Center for Neural Science, New York University, New York, NY, 10003, USA.

17 \* Correspondence to: C.L.E. ([christian.ebbesen@nyumc.org](mailto:christian.ebbesen@nyumc.org)) or R.C.F. ([robert.froemke@med.nyu.edu](mailto:robert.froemke@med.nyu.edu))

18 **Abstract**

19 Social interactions powerfully impact the brain and the body, but high-resolution descriptions of these  
20 important physical interactions are lacking. Currently, most studies rely on labor-intensive methods such  
21 as manual annotation. Scalable and objective tracking methods are required to understand the neural cir-  
22 cuits underlying social behavior. Here we describe a hardware/software system and analysis pipeline that  
23 combines 3D videography, deep learning, physical modeling, and GPU-accelerated robust optimization,  
24 with automatic analysis of neuronal receptive fields recorded in interacting mice. Our system is capable  
25 of fully automatic multi-animal tracking with minimal errors (including in complete darkness) during  
26 complex, spontaneous social encounters, together with simultaneous electrophysiological recordings. We  
27 capture posture dynamics of multiple unmarked mice with high spatiotemporal precision (~2 mm, 60  
28 frames/s). A generative model revealed the multiplexed ‘social receptive field’ of neurons in barrel cortex.  
29 This approach could be broadly useful for neurobehavioral studies of multiple animals interacting in com-  
30 plex low-light environments.

## 31 **Introduction**

32 Objective quantification of natural social interactions is difficult. The majority of our knowledge about  
33 rodent social behavior comes from hand-annotation of videos, yielding ethograms of discrete social be-  
34 haviors such as ‘social following’, ‘mounting’, or ‘anogenital sniffing’<sup>1</sup>. It is widely appreciated that these  
35 methods are susceptible to experimenter bias and have limited throughput. There is an additional problem  
36 with these approaches, in that manual annotation of behavior yields limited information about movement  
37 kinematics and physical body postures. This shortcoming is especially critical for studies relating neural  
38 activity patterns or other physiological signals to social behavior. For example, neural activity in many  
39 areas of the cerebral cortex are strongly modulated by movement and posture<sup>2,3</sup>, and activity profiles in  
40 somatosensory regions can be difficult to analyze without understanding the physics and high-resolution  
41 dynamics of touch. Important aspects of social behavior, from gestures to light touch and momentary  
42 glances can be transient and challenging to observe in most settings, but critical to capturing the details  
43 and changes to social relationships and networks<sup>4,5</sup>.

44

45 The use of deep convolutional networks to recognize objects in images has revolutionized computer vision,  
46 and consequently, also led to major advances in behavioral analysis. Drawing upon these methodological  
47 advances, several recent publications have developed algorithms for single animal<sup>6–13</sup> and multi-animal  
48 tracking<sup>14–21</sup>. These methods function by detection of key-points in 2D videos, and estimation of 3D  
49 postures is not straightforward in interacting animals, where some form of spatiotemporal regularization  
50 is needed to ensure that tracking is stable and error-free, even when multiple animals are closely interacting.  
51 During mounting or allo-grooming, for example, interacting animals block each other from the camera  
52 view and tracking algorithms can fail. Having a large number of cameras film the animals from all sides  
53 can solve these problems<sup>22,23</sup>, but this has required extensive financial resources for equipment, laboratory  
54 space and processing power, which renders widespread use infeasible.

55

56 Some recent single<sup>24</sup>- and multi-animal<sup>17-19</sup> tracking methods have bypassed the problem of estimating  
57 the 3D posture of closely interacting animals by training a classifier to replicate human labeling discrete  
58 behavioral categories, such as attack and mounting. This approach is very powerful for automatically  
59 generating ethograms; however, to relating neural data to behavior, lack of detailed information about  
60 movement and posture kinematics of interacting animals can be a critical drawback. In essentially every  
61 brain region, neural activity is modulated by motor signals<sup>25-28</sup> and vestibular signals<sup>2,3,29</sup>. Thus, any ob-  
62 served differences in neural activity between behavioral categories may be related instead to differences  
63 in movements and postures made by the animals in those different categories. To reveal how neural circuits  
64 process body language, touch and other social cues<sup>21</sup> during a social interaction, descriptions of neural  
65 coding must be able to account for these important but complex motor- and posture-related activity pat-  
66 terns or confounds.

67

68 In parallel with deep-learning based tracking methods, some studies have used depth-cameras for animal  
69 tracking, by fitting a physical 3D body-model of the animal to 3D data<sup>30-32</sup>. These methods are powerful  
70 because they can explicitly model the 3D movement and poses of multiple animals, throughout the social  
71 interaction. However, due to technical limitations of depth imaging hardware (e.g., frame rate, resolution,  
72 motion blur), to date it has been possible only to extract partial posture information about small and fast-  
73 moving animals, such as lab mice. Consequently, when applied to mice, these methods are prone to track-  
74 ing mistakes when interacting animals get close to each other and the tracking algorithms require contin-  
75 uous manual supervision to detect and correct errors. This severely restricts throughput, making tracking  
76 across long time scales infeasible.

77

78 Here we describe a novel system for multi-animal tracking and neuro-behavioral data analysis that com-  
79 bines ideal features from both approaches. Our method fuses physical modeling of depth data and deep  
80 learning-based analysis of synchronized color video to estimate 3D body postures, enabling us to reliably  
81 track multiple mice during naturalistic social interactions. Our method is fully automatic (i.e., quantitative,



82 scalable, and free of experimenter bias), is based on inexpensive consumer cameras, and is implemented  
83 in Python, a simple and widely used computing language. Our method is capable of tracking the animals  
84 using only infrared video channels (i.e., in visual darkness for mice, a nocturnal species), is self-aligning  
85 and requires only a few hundred labeled frames for training. We combine our tracking method with silicon  
86 probe recordings of single-unit activity in barrel cortex to demonstrate the usefulness of a continuous 3D  
87 posture estimation and an interpretable body model: We implement a full-automatic neural data analysis  
88 pipeline (included along with the tracking code), that yields a population-level map of neural tuning to the  
89 features of a social interaction (social touch, movements, postures, spatial location, etc.) directly from raw  
90 behavior video and raw spike trains.

## 91 **Results**

### 92 ***Raw data acquisition***

93 We built an experimental setup that allowed us to capture synchronized color images and depth images  
94 from multiple angles, while simultaneously recording synchronized neural data (**Fig. 1a**). We used inex-  
95 pensive, state-of-the-art ‘depth cameras’ for computer vision and robotics. These cameras contain several  
96 imaging modules: one color sensor, two infrared sensors and an infrared laser projector (**Fig. 1b**). Imaging  
97 data pipelines, as well as intrinsic and extrinsic sensor calibration parameters can be accessed over USB  
98 through a C/C++ SDK with Python bindings. We placed four depth cameras, as well as four synchroniza-  
99 tion LEDs around a transparent acrylic cylinder which served as our behavioral arena (**Fig. 1c**).

100

101 Each depth camera projects a static dot pattern across the imaged scene, adding texture in the infrared  
102 spectrum to reflective surfaces (**Fig. 1d**). By imaging this highly-textured surface simultaneously with two  
103 infrared sensors per depth camera, it is possible to estimate the distance of each pixel in the infrared image  
104 to the depth camera by stereopsis (by locally estimating the binocular disparity between the textured im-  
105 ages). Since the dot pattern is static and only serves to add texture, multiple cameras do not interfere with  
106 each other and it is possible to image the same scene simultaneously from multiple angles. Simultaneous  
107 capture from all angles is one key aspect of our method, not possible with depth imaging systems that rely  
108 on actively modulated light (such as the Microsoft Kinect system and earlier versions of the Intel Re-  
109 alsense cameras, where multi-view capture requires offset capture times).

110

111 Since mouse movement is fast (on a millisecond time scale<sup>33</sup>), it is vital to minimize motion blur in the  
112 infrared images and thus the final 3D data (‘point-cloud’). To this end, our method relies on two key  
113 features. First, we use depth cameras where the infrared sensors have a global shutter (e.g., Intel D435)  
114 rather than a rolling shutter (e.g., Intel D415). Using a global shutter reduces motion blur in individual  
115 image frames, but also enables synchronized image capture across cameras. Without synchronization be-  
116 tween cameras, depth images are taken at different times, which adds blur to the composite point-cloud.

117 We set custom firmware configurations in our recording program, such that all infrared sensors on all four  
118 cameras are hardware-synchronized to each other by TTL-pulses via custom-built, buffered synchroniza-  
119 tion cables (**Fig. 1b**).

120

121 We wrote a custom multithreaded Python program with online compression, that allowed us to capture the  
122 following types of raw data from all four cameras simultaneously: 8-bit RGB images (320 x 210 pixels,  
123 60 frames/s), 16-bit depth images (320 x 240 pixels, 60 frames/s) and the 8-bit intensity trace of a blinking  
124 LED (60 samples/s, automatically extracted in real-time from the infrared images). Our program also  
125 captures camera meta-data, such as hardware time-stamps and frame numbers of each image, which allows  
126 us to identify and correct for possible dropped frames. On a standard desktop PC, the recording system  
127 had very few dropped frames and the video recording frame rate and the imaging and USB image transfer  
128 pipeline was stable (**Fig. 1e,f**).

129

### 130 *Temporal stability and temporal alignment*

131 In order to relate tracked behavioral data to neural recordings, we need precise temporal synchronization.  
132 Digital hardware clocks are generally stable but their internal speed can vary, introducing drift between  
133 clocks. Thus, even though all depth cameras provide hardware timestamps for each acquired image, for  
134 long-term recordings, across behavioral time scales (hours to days), a secondary synchronization method  
135 is required.

136

137 For synchronization to neural data, our recording program uses a USB-controlled Arduino microprocessor  
138 to output a train of randomly-spaced voltage pulses during recording. These voltage pulses serve as TTL  
139 triggers for our neural acquisition system (sampled at 30 kHz) and drive LEDs, which are filmed by the  
140 depth cameras (**Fig. 1a**). The cameras sample an automatically detected ROI to sample the LED state at  
141 60 frames/s, integrating across a full infrared frame exposure (**Fig. 1g**). We use a combination of cross-  
142 correlation and robust regression to automatically estimate and correct for shift and drift between the depth

143 camera hardware clocks and the neural data. Since we use random pulse trains for synchronization, align-  
144 ment is unambiguous and we can achieve super-frame-rate-precision. In a typical experiment, we esti-  
145 mated that the depth camera time stamps drifted with  $\sim 49$   $\mu\text{s}/\text{min}$ . For each recording, we automatically  
146 estimate and correct for this drift to yield stable residuals between TTL flips and depth frame exposures  
147 (**Fig. 1h**). Note that the neural acquisition system is not required for synchronization and for a purely  
148 behavioral study, we can run the same LED-based protocol to correct for potential shift and drift between  
149 cameras by choosing one camera as a reference.

150

### 151 *Detection of body key-points by deep learning*

152 We preprocessed the raw image data to extract two types of information for the tracking algorithm: the  
153 location in 3D in space of body key-points and the 3D point-cloud corresponding to the body surface of  
154 the animals. We used a deep convolutional neural network to detect key-points in the RGB images, and  
155 extracted the 3D point-cloud from the depth images (**Fig. 2a**). For key-point detection (nose, ears, base of  
156 tail, and neural implant for implanted animals), we used a ‘stacked hourglass network’<sup>34</sup>. This type of  
157 encoder-decoder network architecture combines residuals across successive upsampling and downsam-  
158 pling steps to generate its output, and has been successfully applied to human pose estimation<sup>34</sup> and limb  
159 tracking in immobilized flies<sup>35</sup> (**Fig. 2b**, details of network architecture in **Supplementary Fig. 1**).

160

161 We used back-propagation to train the network to output four ‘target maps’, each indicating the pseudo-  
162 posterior probability of each type of key-point, given the input image. The target maps were generated by  
163 manually labeling the key-points in training frames, followed by down-sampling and convolution with  
164 Gaussian kernels (**Fig. 2c**, ‘targets’). We selected the training frames using image clustering to avoid re-  
165 dundant training on very similar frames<sup>8</sup>. The manual key-point labeling can be done with any labeling  
166 software. We customized a version of the lightweight, open source labeling GUI from the ‘DeepPoseKit’  
167 package<sup>8</sup> for the four types of key-points, which we provide as supplementary software (**Supplementary**  
168 **Fig. 2**).

169

170 In order to improve key-point detection, we used two additional strategies. First, we also trained the net-  
171 work to predict ‘affinity fields’<sup>36</sup>, which have been shown to improve human<sup>36</sup> and animal<sup>8,15</sup> body key-  
172 point tracking. We used ‘1D’ affinity fields<sup>8</sup>, generated by convolving the path between labeled body key-  
173 points that are anatomically connected in the animal. With our four key-points, we added seven affinity  
174 fields (e.g., ‘nose-to-ears’, ‘nose-to-tail’), that together form a skeletal representation of each body (**Fig.**  
175 **2c**, ‘affinity fields’). Thus, from three input channels (RGB pixels), the network predicts eleven output  
176 channels (**Fig. 2d**). As the stacked hourglass architecture involves intermediate prediction, which feeds  
177 back into subsequent hourglass blocks (repeated encoding and decoding, **Fig 2b**), prediction of affinity  
178 fields feeds into downstream predictions of body key-points. This leads to improvement of downstream  
179 key-point predictions, because the affinity fields give the network access to holistic information about the  
180 body. The intuitive probabilistic interpretation is that instead of simply asking questions about the key-  
181 points (e.g., ‘do these pixels look like an ear?’), we can increase predictive accuracy by considering the  
182 body context (e.g., ‘these pixels sort of look like an ear, and those pixels sort of look like a nose – but does  
183 this path between the pixels also look like the path from an ear to a nose?’).

184

185 The second optimization approach was image data augmentation during training<sup>37</sup>. Instead of only training  
186 the network on manually-labeled images, we also trained the network on morphed and distorted versions  
187 of the labeled images (**Supplementary Fig. 3**). Training the network on morphed images (e.g., rotated or  
188 enlarged), gives a similar effect to training on a much larger dataset of labeled images, because the network  
189 then learns to predict many artificially generated, slightly different views of the animals. Training the  
190 network on distorted images is thought to reduce overfitting on single pixels and reduce the effect of  
191 motion blur<sup>37</sup>.

192

193 Using a training set of 526 images, and by automatically adjusting learning rate during training, the net-  
194 work was well-trained (plateaued) within one hour of training on a standard desktop computer (**Fig. 2e**),  
195 yielding good predictions of both body key-points and affinity fields (**Fig. 2f**).

196

### 197 *All-infrared tracking*

198 As mice are nocturnal, we also developed a version of the tracking software that only relies on the infrared  
199 video stream (i.e., in visual darkness for the mice). This facilitates the study of naturalistic social interac-  
200 tions in darkness. For ‘all-infrared’ experiments, the arena was lit with infrared LED lamps, and the soft-  
201 ware was changed to save only the infrared images (16-bit, 640 x 448, 60 frames/s). Detection of body  
202 key-points by deep learning from in these images are made difficult by the prominent infrared laser dot  
203 pattern (**Fig. 2g**). We trained the deep neural network to ignore the dot pattern by using a data augmenta-  
204 tion strategy. We recorded and labeled body parts in a training data set (720 images), where the infrared  
205 laser was turned off, and trained the network on labeled images augmented with a probabilistically gener-  
206 ated noise pattern of white dots with a similar size and density to the ‘real’ laser pattern (**Fig. 2h**). A  
207 network trained on these data allowed us to successfully detect body key-points in real images with the  
208 infrared laser turned on (**Fig. 2i**).

209

210 To optimize the network architecture and estimate pseudo-posterior probability cutoffs in the network  
211 output maps with a good tradeoff between missed body key-points, false positives and network training/in-  
212 ference time, we profiled the network across the number of hourglass stacks (**Supplementary Figs. 4, 5**),  
213 with and without various types of training data augmentation (**Supplementary Fig. 6**), and with and with-  
214 out part affinity fields (**Supplementary Fig. 7**). Based on the hand-labeled validation data, we found that  
215 3 hourglass stacks and a pseudo-posterior probability cutoff of 0.5 led to good performance (**Supplemen-**  
216 **tary Figs. 4-7**).

217

218 ***Pre-processing of 3D video***

219 By aligning the color images to the depth images, and aligning the depth images in 3D space, we could  
220 assign three dimensional coordinates to the detected key-points. We pre-processed the depth data to ac-  
221 complish two goals. First, we wanted to align the cameras to each other in space, so we could fuse their  
222 individual depth images to one single 3D point-cloud. Second, we wanted to extract only points corre-  
223 sponding to the animals' body surfaces from this composite point-cloud.

224

225 To align the cameras in space, we filmed the trajectory of a sphere that we moved around the behavioral  
226 arena. We then used a combination of motion filtering, color filtering, smoothing, and thresholding to  
227 detect the location of the sphere in the color frame, extracted the partial 3D surface from the aligned depth  
228 data, and used a robust regression method to estimate the center coordinate (**Fig. 3a**). This procedure  
229 yielded a 3D trajectory in the reference frame of each camera (**Fig. 3b**) that we could use to robustly  
230 estimate the transformation matrices needed to bring all trajectories into the same frame of reference (**Fig.**  
231 **3c**). This robust alignment is a key aspect of our method, as errors can easily be introduced by moving the  
232 sphere too close to a depth camera or out of the field of view during recording (**Fig. 3b,c**, arrow). After  
233 alignment, the median camera-to-camera difference in the estimate of the center coordinate of the 40-mm-  
234 diameter sphere was only 2.6 mm across the entire behavioral arena (**Fig. 3d,e**).

235

236 We used a similar robust regression method to automatically detect the base of the behavioral arena. We  
237 detected planes in composite point-cloud (**Fig. 3f**) and used the location and normal vector, estimated  
238 across 60 random frames (**Fig. 3g**), to transform the point-cloud such that the base of the behavioral arena  
239 laid in the  $xy$ -plane (**Fig. 3h**). To remove imaging artifacts stemming from light reflection and refraction  
240 due to the curved acrylic walls, we automatically detected the location and radius of the acrylic cylinder  
241 (**Fig. 3i**). With the location of both the arena base and the acrylic walls, we used simple logic filtering to  
242 remove all points associated with the base and walls, leaving only points inside the behavioral arena (**Fig.**

243 **3j)**. Note that if there is no constraint on laboratory space, an elevated platform can be used as a behavioral  
244 arena, eliminating imaging artifacts associated with the acrylic cylinder.

245

### 246 *Loss function design*

247 The pre-processing pipeline described above takes color and depth images as inputs, and outputs two types  
248 of data: a point-cloud, corresponding to the surface of the two animals, and the 3D coordinates of detected  
249 body key-points (**Fig. 4a, Supplementary Video 1**). To track the body postures of interacting animals  
250 across space and time, we developed an algorithm that incorporates information from both data types. The  
251 basic idea of the tracking algorithm is that for every frame, we fit the mouse bodies by minimizing a loss  
252 function of both the point-cloud and key-points, subject to a set of spatiotemporal regularizations.

253

254 For the loss function, we made a simple parametric model of the skeleton and body surface of a mouse.  
255 The body model consists of two prolate spheroids (the ‘hip ellipsoid’ and ‘head ellipsoid’), with dimen-  
256 sions based on an average adult mouse (**Fig. 4b**). The head ellipsoid is rigid, but the hip ellipsoid has a  
257 free parameter ( $s$ ) modifying the major and minor axes to allow the hip ellipsoids to be longer and narrower  
258 (e.g., during stretching, running, or rearing) or shorter and wider (e.g., when still or self-grooming). The  
259 two ellipsoids are connected by a joint that allows the head ellipsoid to turn left/right and up/down within  
260 a cone corresponding to the physical movement limits of the neck.

261

262 Keeping the number of degrees of freedom low is vital to make loss function minimization computation-  
263 ally feasible<sup>38</sup>. Due to the rotational symmetry of the ellipsoids, we could choose a parametrization with  
264 8 degrees of freedom per mouse body: the central coordinate of the hip ellipsoid ( $x, y, z$ ), the rotation of  
265 the major axis of the hip ellipsoid around the  $y$ - and  $z$ -axis ( $\beta, \gamma$ ), the left/right and up/down rotation of the  
266 head ellipsoid ( $\theta, \varphi$ ), and the stretch of the hip ellipsoids ( $s$ ). For the implanted animal, we added an  
267 additional sphere to the body model, approximating the surface of the head-mounted neural implant (**Fig.**



268 **4b)**. The sphere is rigidly attached to the head ellipsoid and has one degree of freedom; a rotational angle  
269 ( $\psi$ ) that allows the sphere to rotate around the head ellipsoid, capturing head tilt of the implanted animal.

270 Thus, in total, the joint pose (the body poses of both mice) was parametrized by only 17 variables.

271

272 To fit the body model, we adjusted these parameters to minimize a weighted sum of two loss terms: (i)  
273 The shortest distance from every point in the point-cloud to body model surface. (ii) The distance from  
274 detected key-points to their corresponding location on the body model surface (e.g., nose key-points near  
275 the tip of one of the head ellipsoids, tail key-points near the posterior end of a hip ellipsoid).

276

277 We then used several different approaches for optimizing the tracking. First, for each of the thousands of  
278 point in the point-cloud, we needed to calculate the shortest distance to the body model ellipsoids. Calculu-  
279 lating these distances exactly is not computationally feasible, as this requires solving a six-degree polyno-  
280 mial for every point<sup>39</sup>. As an approximation, we instead used the shortest distance to the surface, along a  
281 path that passes through the centroid (**Supplementary Fig. 8a,b**). Calculating this distance could be im-  
282 plemented as pure tensor algebra<sup>40</sup>, which could be executed efficiently on a GPU in parallel for all points  
283 simultaneously. Second, to reduce the effect of imaging artifacts in the color and depth imaging (which  
284 can affect both the point-cloud or the 3D coordinates of the key-points), we clipped distance losses at 3  
285 cm, such that distant ‘outliers’ do contribute and not skew the fit (**Supplementary Fig. 8c**). Third, because  
286 pixel density in the depth images depends on the distance from the depth camera, we weighed the contri-  
287 bution of each point in the point-cloud by the squared distance to the depth camera (**Supplementary Fig.**  
288 **8d**). Fourth, to ensure that the minimization does not converge to unphysical joint postures (e.g., where  
289 the mouse bodies are overlapping), we added a penalty term to the loss function if the body models overlap.  
290 Calculating overlap between two ellipsoids is computationally expensive<sup>41</sup>, so we computed overlaps be-  
291 tween implant sphere and spheres centered on the body ellipsoids with a radius equal to the minor axis  
292 (**Supplementary Fig. 8f**). Fifth, to ensure spatiotemporal continuity of body model estimates, we also  
293 added a penalty term to the loss function, penalizing overlap between the mouse body in the current frame,

294 and other mouse bodies in the previous frame. This ensures that the bodies do not switch place, something  
295 that could otherwise happen if the mice are in joint poses with certain mirror symmetries (**Supplementary**  
296 **Fig. 8g,h**).

297

### 298 *GPU-accelerated robust optimization*

299 Minimizing the loss function requires solving three major challenges. The first challenge is computational  
300 speed. The number of key-points and body parts is relatively low (~tens), but the number of points in the  
301 point-cloud is large (~thousands), which makes the loss function computationally expensive. For minimi-  
302 zation, we need to evaluate the loss function multiple times per frame (at 60 frames/s). If loss function  
303 evaluation is not fast, tracking becomes unusably slow. The second challenge is that the minimizer has to  
304 properly explore the loss landscape within each frame and avoid local minima. In early stages of develop-  
305 ing this algorithm, we were only tracking interacting mice with no head implant. In that case, for the small  
306 frame-to-frame changes in body posture, the loss function landscape was nonlinear, but approximately  
307 convex, so we could use a fast, derivative-based minimizer to track changes in body posture (geodesic  
308 Levenberg-Marquardt steps<sup>38</sup>). For use in neuroscience experiments, however, one or more mice might  
309 carry a neural implant for recording or stimulation. The implant is generally at a right angle and offset  
310 from the ‘hinge’ between the two hip and head ellipsoids, which makes the loss function highly non-  
311 convex<sup>42</sup>. The final challenge is robustness against local minima in state space. Even though a body pos-  
312 ture minimizes the loss in a single frame, it might not be an optimal fit, given the context of other frames  
313 (e.g., spatiotemporal continuity, no unphysical movement of the bodies).

314

315 To solve these three challenges – speed, state space exploration, and spatiotemporal robustness – we de-  
316 signed a custom GPU-accelerated minimization algorithm, which incorporates ideas from annealed parti-  
317 cle filters<sup>43</sup> and online Bayesian filtering (**Fig. 4c**). To maximize computational speed, the algorithm was  
318 implemented as pure tensor algebra in Pytorch, a high-performance GPU computing library<sup>44</sup>. Annealed  
319 particle filters are suited to explore highly non-convex loss surfaces<sup>43</sup>, which allowed us to avoid local

320 minima within each frame. Between frames, we used online filtering, to avoid being trapped in low-prob-  
321 ability solutions given the context of the preceding tracking. For every frame, we first proposed the state  
322 of the 17-parameters using a recursive least-squares ('RLS') filter bank trained on preceding frames. After  
323 particle filter-based loss function minimization within a single frame, we updated the RLS filter bank, and  
324 proposed a particle filter starting point for the next frame (**Fig. 4d-e**).

325

326 The 'two-layer' tracking strategy (particle filter within frames and RLS filter between frames) has three  
327 major advantages. First, by proposing a solution from the RLS bank, we often already start the loss func-  
328 tion minimization close to the new minimum. Second, if the RLS filter deems that the fit for a single frame  
329 is unlikely (an outlier), based on the preceding frames, this fit will only weakly update the filter bank, and  
330 thus only weakly perturb the upcoming tracking. This gives us a convenient way to balance the information  
331 provided by the fit of a single frame, and the 'context' provided by previous frames. Third, the RLS filter-  
332 based approach is only dependent on previously tracked frames, not future frames. This is in contrast to  
333 other approaches to incorporating context that rely on versions of backwards belief propagation<sup>5,16,35</sup>. Note  
334 that since our algorithm only relies on past data for tracking, it is possible – in future work – to optimize  
335 our algorithm for real-time use in closed-loop experiments.

336

337 For each recording, we first automatically initiated the tracking algorithm: We automatically scanned for-  
338 ward in the video to find a frame, where the mice were well separated (assessed by *k*-means clustering of  
339 the 3D positions of the body key-points into two clusters, and by requiring that the 'cross-mouse' cluster  
340 distance is at least 5 cm (**Supplementary Fig. 9**). From this starting point, we explored the loss surface  
341 with 200 particles (**Fig. 4d**). We generated the particles by perturbing the proposed minimum by quasi-  
342 random, low-discrepancy sampling<sup>45</sup> (**Supplementary Fig. 10**). We exploited the fact that the loss func-  
343 tion structure allowed us to execute several key steps in parallel, across multiple independent dimensions,  
344 and implemented these calculations as vectorized tensor operations. This allowed us to leverage the power  
345 of CUDA kernels for fast tensor algebra on the GPU<sup>44</sup>. Specifically, to efficiently calculate the point-cloud

346 loss (shortest distance from a point in the point-cloud to the surface of a body model), we calculated the  
347 distance to all five body model spheroids for all points in the point-cloud and for all 200 particles, in  
348 parallel (**Fig. 4c**). We then applied fast minimization kernels across the two body models, to generate a  
349 smallest distance to either mouse, for all points in the point cloud. Because the mouse body models are  
350 independent, we only had to apply a minimization kernel to calculate the smallest distance, for every point,  
351 to 40,000 (200 x 200) joint poses if the two mice. These parallel computation steps are a key aspect of our  
352 method, which allows our tracking algorithm to avoid the ‘curse of dimensionality’, by not exploring a  
353 17-dimensional space, but rather explore the intersection of two independent 8-dim and 9-dim subspaces  
354 in parallel. We found that our GPU-accelerated implementation of the filter increased the processing time  
355 of a single frame by more than an order of magnitude compared to a fast CPU (e.g. ~16-fold speed increase  
356 for 200 particles, **Fig. 4f**).

357

### 358 *Tracking algorithm performance*

359 To ensure that the tracking algorithm did not get stuck in suboptimal solutions, we forced the particle filter  
360 to explore a large search space within every frame (**Supplementary Fig. 11a-c**). In successive iterations,  
361 we gradually made perturbations to the particles smaller and smaller by annealing the filter<sup>43</sup>), to approach  
362 the minimum. At the end of each iteration, we ‘resampled’ the particles by picking the 200 joint poses  
363 with the lowest losses in the 200-by-200 matrix of losses. This ‘top-k’ resampling strategy has two ad-  
364 vantages. First, it can be done without fully sorting the matrix<sup>46</sup>, the most computationally expensive step  
365 in resampling<sup>47</sup>. Second, it provides a type of ‘importance sampling’. During resampling, some poses in  
366 the next iteration might be duplicates (picked from the same row or column in the 200-by-200 loss matrix.),  
367 allowing particles in each subspace to collapse at different rates (if the particle filter is very certain about  
368 one body pose, but not the other, for example).

369

370 By investigating the performance of the particle filter across iterations, we found that the filter generally  
371 converged sufficiently within five iterations (**Supplementary Fig. 11d, Supplementary Video 2**) to pro-  
372 vide good tracking across frames (**Supplementary Fig. 11e**). In every frame, the particle filter fit yields a  
373 noisy estimate of the 3D location of the mouse bodies. The transformation from the joint pose parameters  
374 (e.g., rotation angles, spine scaling) to 3D space is highly nonlinear, so simple smoothing of the trajectory  
375 in pose parameter space would distort the trajectory in real space. Thus, we filtered the tracked trajectories  
376 by a combination of Kalman-filtering and maximum likelihood-based smoothing<sup>48,49</sup> and 3D rotation  
377 smoothing in quaternion space<sup>50</sup> (**Supplementary Fig. 12, Supplementary Video 3**).

378

379 Representing the joint postures of the two animals with this parametrization was highly data efficient,  
380 reducing the memory footprint from ~3.7 GB/min for raw color/depth image data, to ~0.11 GB/min for  
381 pre-processed point-cloud/key-point data to ~1 MB/min for tracked body model parameters. On a regular  
382 desktop computer with a single GPU, we could do key-point detection in color image data from all four  
383 cameras in ~2x real time (i.e., it took 30 minute to process a 1 hr experimental session). Depth data pro-  
384 cessing (point-cloud merging and key-point deprojection) ran at ~0.7x real time, and the tracking algo-  
385 rithm ran at ~0.2x real time (if the filter uses 200 particles and 5 filter iterations per frame). Thus, for a  
386 typical experimental session (~ hours), we would run the tracking algorithm overnight, which is possible  
387 because the code is fully automatic.

388

### 389 ***Error detection***

390 Error detection and correction is a critical component of behavioral tracking. Even if error rates are nom-  
391 inally low, errors are non-random, and errors often happen exactly during the behaviors in which we are  
392 most interested: interactions. In multi-animal tracking, two types of tracking error are particularly fatal as  
393 they compound over time: identity errors and body orientation errors (**Supplementary Fig. 13a**). In con-  
394 ventional tracking approaches using only 2D videos, it is often difficult to correctly track identities when  
395 interacting mice are closely interacting, allo-grooming, or passing over and under each other. Although

396 swapped identities can be corrected later once the mice are well-separated again, this still leaves individual  
397 behavior during the actual social interaction unresolved<sup>5,16</sup>. We found that our tracking algorithm was  
398 robust against both identity swaps (**Supplementary Fig. 13b-e**) and body direction swaps (**Supplemen-**  
399 **tary Fig. 14**). This observation agrees with the fact that tracking in 3D space (subject to our implemented  
400 spatiotemporal regularizations) should in principle allow better identity tracking. In full 3D space it is  
401 easier to determine who is rearing over whom during an interaction, for example.

402

403 To test our algorithm for subtler errors, we manually inspected 500 frames, randomly selected across an  
404 example 21-minute recording session. In these 500 frames, we detected only a single tracking mistake,  
405 corresponding to 99.8% correct tracking (**Supplementary Fig. 15a**). The identified tracking mistake was  
406 visible as a large, transient increase in the point-cloud loss function (**Supplementary Fig. 15b**). After the  
407 tracking mistake, the robust particle filter quickly recovered to correct tracking again (**Supplementary**  
408 **Fig. 15c**). By detecting such loss function anomalies, or by detecting ‘unphysical’ postures or movements  
409 in the body models, potential tracking mistakes can be automatically ‘flagged’ for inspection (**Supple-**  
410 **mentary Fig. 15c,d**). After inspection, errors can be manually corrected or automatically corrected in  
411 many cases, for example by tracking the particle filter backwards in time after it has recovered. As the  
412 algorithm recovers after a tracking mistake, it is generally unnecessary to actively supervise the algorithm  
413 during tracking, and manual inspection for potential errors can be performed after running the algorithm  
414 overnight. We provide a GUI for viewing and quality control of tracked behavior (raw data, body skeleton,  
415 ellipsoid surfaces and time trajectory) running in an interactive Jupyter notebook (**Supplementary Fig.**  
416 **2b, Supplementary Video 5**).

417

#### 418 *Automated analysis of movement kinematics and social events*

419 As a validation of our tracking method, we demonstrate that our methods can automatically extract both  
420 movement kinematics and behavioral states (movement patterns, social events) during spontaneous social  
421 interactions. Some unsupervised methods for discovering structure and states in behavioral data do not

422 rely on an explicit body model of the animal, and instead use statistical methods to detect behavioral states  
423 directly from tracked features<sup>6,33,51–53</sup>. In an alternative approach, some supervised methods label behav-  
424 ioral events of interest by hand on training data, and then train a classifier to find similar events in unlabeled data<sup>17–19</sup>. Both of these types of analysis are compatible with our method (e.g., by running directly  
425 on the time series data of the 17 dimensions that parametrize the body models of the two animals, **Sup-**  
426 **plementary Fig. 11**). Our tracking system yields an easily interpretable 3D body model of the animals,  
427 which makes two additional types of analyses straightforward as well: First, we can easily define 3D body  
428 postures or multi-animal postures of interest as templates<sup>16,30</sup>. Second, we can use unsupervised methods  
429 to discover behavioral states in the 3D reference frame of the animal’s own body, making these models  
430 and states straightforward to interpret and ‘sanity check’ (manually inspect for errors).

432

433 To demonstrate posture-template-based analysis, we defined social behaviors of interest as templates and  
434 matched these templates to tracked data. We know that anogenital sniffing<sup>54</sup> and nose-to-nose touch<sup>55</sup> are  
435 prominent events in rodent social behavior, so we designed a template to detect these events. In this tem-  
436 plate, we exploited the fact that we could easily calculate both body postures and movement kinematics,  
437 in the reference frame of each animal’s own body. For every frame, we first extracted the 3D coordinates  
438 of the body model skeleton (**Supplementary Fig. 12a**). From these skeleton coordinates, we calculated  
439 the position (**Fig. 5a**) and a three-dimensional speed vector for each mouse (‘forward speed’, along the  
440 hip ellipsoid, ‘left speed’ perpendicular the body axis and ‘up speed’ along the z-axis; **Fig. 5b**). We also  
441 calculated three instantaneous ‘social distances’, defined as the 3D distance between the tip of each ani-  
442 mal’s noses (‘nose-to-nose’; **Fig. 5b**), and from the tip of each animal’s nose to the posterior end of the  
443 conspecific’s hip ellipsoid (‘nose-to-tail’; **Fig. 5b**). From these social distances, we could automatically  
444 detect when the mouse bodies were in a nose-to-nose or a nose-to-tail configuration (**Fig. 5c**). It is straight-  
445 forward to further subdivide these social events by body postures and kinematics, in order to separate  
446 stationary nose-to-tail configurations (anogenital sniffing/grooming) and nose-to-tail configurations dur-  
447 ing locomotion (social following).



448

449 To demonstrate unsupervised behavioral state discovery, we used GPU-accelerated probabilistic program-  
450 ming<sup>56</sup> and state space modeling to automatically detect and label movement states. To discover types  
451 locomotor behavior, we fitted a ‘sticky’ multivariate hidden Markov model<sup>57</sup> to the two components of  
452 the speed vector that lie in the *xy*-plane (**Supplementary Fig. 16a-h**). With five hidden states, this model  
453 yielded interpretable movement patterns that correspond to known mouse locomotor ‘syllables’: resting  
454 (no movement), turning left and right, and moving forward at slow and fast speeds (**Fig. 5d**). Fitting a  
455 similar model with three hidden states to the *z*-component of the speed vector (**Supplementary Fig. 16i-**  
456 **n**) yielded interpretable and known ‘rearing syllables’: rest, rearing up and ducking down (**Fig. 5e**). Using  
457 the maximum *a posteriori* probability from these fitted models, we could automatically generate locomo-  
458 tor ethograms and rearing ethograms for the two mice (**Fig. 5b**).

459

460 In line with previous observations, we found that movement bouts were short (medians,  
461 rest/left/right/fwd/fast-forward: 0.83/0.50/0.52/0.45/0.68 s, a ‘sub-second’ timescale<sup>33</sup>). In the locomotion  
462 ethograms, bouts of rest were longer than bouts of movement (all  $p < 0.05$ , Mann-Whitney U-test; **Fig. 5f**)  
463 and bouts of fast forward locomotion was longer than other types of locomotion (all  $p < 0.001$ , Mann-  
464 Whitney U-test; **Fig. 5f**). In the rearing ethograms, the distribution of rests was very wide, consisting of  
465 both long (~seconds) and very short (~tenths of a second) periods of rest (**Fig. 5g**). As expected, by plotting  
466 the rearing height against the duration of rearing syllables, we found that short rests in rearing were asso-  
467 ciated with standing high on the hind legs (the mouse rears up, waits for a brief moment before ducking  
468 back down), while longer rests happened when the mouse was on the ground (‘rearing’ and ‘crouching’,  
469 **Fig. 5h**). Like the movement types and durations, the transition probabilities from the fitted hidden Mar-  
470 kov models were also in agreement with known behavioral patterns. In the locomotion model, for example,  
471 the most likely transition from “rest” was to “slow forward”. From “slow forward”, the mouse was likely  
472 to transition to “turning left”, “fast forward” or “turning right”, it was unlikely to transition directly from  
473 “fast forward” to “rest” or from “turning left” to “turning right, and so on (**Supplementary Fig. 16o,p**).



474

475 ***Automatic measurement of firing rate modulations during social touch***

476 By combining our tracking system with silicon-probe recording of single unit activity, we could automat-  
477 ically measure how neural activity is modulated during social interactions. As proof-of-concept for our  
478 system, we implanted a male mouse with a 32-channel silicon probe electrode in barrel cortex (the primary  
479 whisker representation in somatosensory cortex). In an example experiment, we simultaneously recorded  
480 31 single units in barrel cortex while tracking the behavior of the implanted mouse interacting with a male  
481 and a female conspecific for 20 minutes each. We then used the posture-template-based analysis to detect  
482 three types of social touch events: nose-to-nose touch (“Nose ↔ Nose”), the implanted animal touching  
483 the partner’s anogenital region with its whiskers (“Nose0 → Tail1”) and the partner animal touching the  
484 implanted animal’s anogenital region with its whiskers (“Nose1 → Tail0”, **Fig. 6a**). The automatic pos-  
485 ture-template-based analysis confirmed<sup>58</sup> that the duration of social touch events and inter-touch-intervals  
486 spanned multiple orders of magnitude (from short millisecond touch events to longer touch events lasting  
487 multiple seconds, **Fig 6b-d**).

488

489 Using a ‘classic’ peri-stimulus time histogram-based analysis, we found several single units that had a  
490 significant firing modulation at the time of the detected social touch events (example neurons shown in  
491 **Fig. 6e**, top row, labeled “naïve PSTH”). The firing rate modulations detected in the “naïve” approach  
492 were surprisingly small (only a small ‘bump’ in the PSTH at the time of touch), and much smaller than  
493 observed in ‘classic’ barrel cortex studies, where a controlled whisker stimulus is presented<sup>59</sup>. We won-  
494 dered if the magnitude of firing rate modulation appeared small in the PSTHs, because during un-trained  
495 and self-initiated behavior, the detected touch events occurred in close temporal proximity and/or were  
496 overlapping with other touch events and postural changes<sup>58</sup>. To test the possibility that larger effects sizes  
497 were masked by other touch events occurring in close temporal proximity, we also computed PSTHs where  
498 we only included social touch events where no other social touch event was detected in the ‘baseline’  
499 period (4 seconds before the social touch). In these PSTHs with a “cleaned” baseline (**Fig. 6e**, bottom row,

500 labeled “cleaned PSTH”), we both observed a larger proportion of neurons with a significant change in  
501 firing rate (**Fig. 6f**) and a larger effect size compared to the naïve PSTHs (**Fig. 6g**, the distributions of  
502 effect sizes in the cleaned PSTH are “wider”). For example, the third neuron shown in **Figure 6e** showed  
503 no firing rate modulation in the naïve PSTH, but instead showed a large, highly statistically significant  
504 firing rate decrease around whisker touch in the “cleaned” PSTH.

505

### 506 *Fully automatic mapping of ‘social receptive fields’*

507 Cleaning the PSTHs (by controlling for only three types of social touch) increased our estimates of the  
508 magnitude of firing rate modulations associated with social touch events. However, a PSTH-based analysis  
509 strategy has inherent drawbacks when analyzing naturalistic behavior. During free behavior, touch, move-  
510 ment and postural changes happen simultaneously, as continuous and overlapping variables. Furthermore,  
511 in line with “vicarious” somatosensory responses reported in human somatosensory cortex<sup>60</sup> and barrel  
512 cortex responses observed just before touch<sup>61</sup>, barrel cortex neurons may be related to the behavior of the  
513 partner animal, in a kind of “mirror neuron”-like response.

514

515 To deal with these challenges, we drew inspiration from discovery of multiplexed spatial coding in hip-  
516 pocampal circuits<sup>62</sup> and developed a fully-automatic python pipeline that can automatically discover ‘so-  
517 cial’ receptive fields. Our tracking method is able to recover the 3D posture and head direction of both  
518 animals: The head direction of the implanted animal was given by the skeleton of the body model (the  
519 implant is fixed to the head). For computational efficiency, we exploited the rotational symmetry of the  
520 body model of the non-implanted partner to decrease the dimensionality of the search space during track-  
521 ing (**Fig. 4c**) and used the 3D coordinates of the detected ‘ear’ key-points to infer the 3D head direction  
522 of the partner (**Supplementary Figs. 17,18**).

523

524 Using the full 3D body model of both animals, we designed our analysis pipeline to automatically extract  
525 45 continuous features that might be associated with firing rate changes in a social interaction: social

526 “between-animal” features (nose-to-nose distance, nose-to-partner’s-genitals distance, relative orientation  
527 of the partner with respect to the implanted animal, and a temporal derivative of the distance between the  
528 center of the two hip ellipsoids that measures if the animals are moving towards each other or away from  
529 each other, **Fig. 7a**), postural features (head yaw/pitch/roll, etc.), spatial features (to detect ‘spatial’ activity,  
530 such as place fields, border or head-direction activity), movement features (temporal derivatives of the  
531 running trajectory, temporal derivatives of posture angles, etc.), and posture, space and movement features  
532 of the partner animal (**Fig. 7b**, **Supplementary Fig. 19a**, detailed feature table in Methods).

533

534 We assumed the following generative model of the observed neuronal spike trains<sup>62</sup>: A neuron’s spike  
535 train is generated by a Poisson process, and the rate of this Poisson process is determined by a linear  
536 combination of the behavioral predictors, each associated with their own tuning curve (**Fig. 7c**). To deter-  
537 mine what behavioral features significantly contribute to the firing rate modulation of a neuron, and the  
538 associated tuning curves, we used a model comparison approach: Starting from a null model where the  
539 observed spikes are simply generated by a Poisson process with a constant rate, we iteratively added pre-  
540 dictors that passed a cross-validated significance criterion (a significant increase in likelihood compared  
541 to a simpler model). The tuning curves were regularized to be smooth and allowed to be re-fit with each  
542 additional predictor added to the multiplexed code (details in Methods).

543

544 Using this analysis approach, we found several neurons with a multiplexed encoding of features of the  
545 social interactions (**Fig. 7d-e**). Because of the 3D body models, the discovered neural coding schemes  
546 were straightforward to interpret and compare to expected touch-related response patterns in barrel cor-  
547 tex<sup>59</sup>. For example, the example neuron shown in **Fig. 7d** is strongly modulated by social facial touch  
548 (strongly tuned to a low nose-to-nose distance) and strongly lateralized (the neuron is strongly tuned to  
549 orientation angle, with a peak at  $\sim -\pi/2$ , i.e., when the partner is on the contralateral side of the animal’s  
550 face, relative to the implanted recording electrode). The example neuron shown in **Fig. 7e** was also  
551 strongly tuned to social facial touch (tuned to a low nose-to-nose distance), was strongly tuned to a positive

552 head roll (i.e., when the head is turned such that the whisker field contralateral to the recording electrode  
553 is in contact with the floor) and was strongly tuned to a positive temporal derivative of the hip ellipsoid  
554 yaw (when the animal is running counterclockwise, e.g., along the edge of the arena, such that the contra-  
555 lateral whisker field is brushing against the arena wall or other obstacles). Across the population, we found  
556 that the neurons overwhelmingly encoded whisker touch and orientation angle (lateralization), and the  
557 posture and movements of the implanted animal, but not the partner animal (**Fig. 7f**).

558

### 559 *Mapping the network topology of social responses*

560 To map how neurons across the population might also be tuned to features of social interactions, we ex-  
561 tracted the estimated neural tuning curves of all features that were encoded by at least 4 neurons (**Fig. 8a**).  
562 For some features, there was a clear pattern across the population, in line with known response patterns in  
563 barrel cortex<sup>59</sup>: All neurons that were modulated by social touch increased their firing rate during touch  
564 (tuned to a low nose-to-nose and nose-to-tail distance), were tuned to touch contralateral to the implanted  
565 electrode (tuning peak at orientation angle  $\approx -\pi/2$ ), and decreased firing rate during higher locomotion  
566 speeds (negatively correlated with forward speed). For the remaining movement and posture features, the  
567 tuning was more heterogeneous across the population (**Fig. 8a**).

568

569 Finally, our automatic tracking and tuning curve estimation pipeline makes it straightforward to determine  
570 how features might be multiplexed together in the same neurons. In our example session, we found that  
571 52% of the neurons encoded at least one behavioral feature, with a median number of five encoded features  
572 (**Fig. 8b**). Using all neurons that encoded at least one feature, we computed a population “co-encoding  
573 matrix”, where the entries of the matrix is the probability that two features are encoded by the same neuron  
574 (**Fig. 8c, Supplementary Fig. 19b**). This co-encoding matrix was structured, such that there was a large  
575 overlap between neurons that encode nose-to-nose touch, neurons that encode nose-to-partner-genital  
576 touch and neurons that had lateralized responses (modulated by the relative orientation angle of the ani-  
577 mals, preferring touch to the contralateral whisker field, relative to the implanted recording electrode<sup>59</sup>,

578 **Fig. 8d**). The co-encoding matrix specified a network graph of encoded features (**Fig. 8e**), which would  
579 then be amenable to various methods of network topology analysis (e.g., locality, clustering, subgraph  
580 motifs, etc.). Thus, our fully-automatic pipeline enables direct connections from raw behavioral videog-  
581 raphy and spike train recordings to higher-order statistics about how features of a social interaction are  
582 mapped onto a neural population during naturalistic behavior.

583 **Discussion**

584 We combined 3D videography, deep learning and GPU-accelerated robust optimization to estimate the  
585 posture dynamics of multiple freely-moving mice, engaging in naturalistic social interactions. Our method  
586 is cost-effective (requiring only inexpensive consumer depth cameras and a GPU), has high spatiotemporal  
587 precision, is compatible with neural implants for continuous electrophysiological recordings, and tracks  
588 unmarked animals of the same coat color (e.g., enabling behavioral studies in transgenic mice). Our  
589 method is fully unsupervised, which makes the method scalable across multiple PCs or GPUs. Unsuper-  
590 vised tracking allows us to investigate social behavior across long behavioral time scales beyond what is  
591 feasible with manual annotation, in order to elucidate developmental trajectories, dynamics of social learn-  
592 ing, or individual differences among animals<sup>63,64</sup>, among other types of questions. Finally, our method  
593 uses no message-passing from future frames, but only relies on past data, which makes the method a  
594 promising starting point for real-time tracking. A major next step for future work is to apply such algo-  
595 rithms to animal behavior in different conditions. For example, the algorithm can easily be adapted to  
596 track other animal body shapes such as juvenile mice or other species, or movable, deformable objects  
597 that might be important for foraging or other behaviors in complex environments.

598

599 ***Multi-animal body tracking and mirror neurons***

600 In social interactions, rodents respond to the behavior of conspecifics, but we are only beginning to dis-  
601 cover how the rodent brain encodes complex features such as gaze direction or body postures of oth-  
602 ers<sup>3,21,65,66</sup>. Compared to our knowledge about sensorimotor mirror neurons in monkeys<sup>67</sup> and vicarious  
603 sensory responses in human subjects<sup>60</sup> (both foundational to theories about human social cognition<sup>68</sup> and  
604 empathy<sup>69</sup>), we still know very little about a putative rodent mirror neuron system<sup>69</sup>. For demonstration  
605 and validation, we applied our analysis pipeline to barrel cortex neurons, and were able to recover expected  
606 neural tuning to (lateralized) whisker touch and movement<sup>59</sup>. Our end-to-end tracking method and analysis  
607 pipeline maps tuning to movements and postures of the partner's body, and is also ideally suited to detect  
608 potential social interaction systems such as rodent 'mirror neuron' signals in other brain areas<sup>70,71</sup>. The 45

609 potential predictors that we have included in our analysis pipeline could be expanded to add additional  
610 features of interest. Similar to multiplexed spatial tuning in parahippocampal cortices (e.g., “conjunctive”  
611 grid- and head-direction cells<sup>72</sup>), we model multiplexed tuning as multiplicative<sup>62</sup>. It is straightforward to  
612 modify our model comparison code to also consider other coding schemes, such as nonlinear or condi-  
613 tional interactions between predictors. This is of particular interest to the social neuroscience of joint ac-  
614 tion, where movements and postures can have particular social meaning when performed in coordination  
615 with a social partner<sup>21</sup>.

616

### 617 *Automatic mapping of social phenotypes*

618 Social dysfunctions can be devastating symptoms in a multitude of mental conditions, including autism  
619 spectrum disorders, social anxiety, depression, and personality disorders<sup>73</sup>. Social interactions also pow-  
620 erfully impact somatic physiology, and social interactions are emerging as a promising protective and  
621 therapeutic element in somatic conditions, such as inflammation<sup>74</sup> and chronic pain<sup>75</sup>. Disorders charac-  
622 terized by deficits in social interaction and communication generally lack effective treatment options,  
623 largely because even the neurobiological basis of ‘healthy’ social behavior is poorly understood. In addi-  
624 tion to relating behavior to neural activity, automated 3D body tracking can yield a high-fidelity readout  
625 of behavioral changes associated with manipulations of neural activity, both at short (e.g., optogenetic),  
626 medium (e.g., pharmacological) and long (e.g., gene knockout) time scales.

627

628 Long-term multi-animal behavior tracking has a particular advantage in comparative social neuroscience.  
629 For example, human genomics have linked several genes to autism<sup>2-4</sup>, but we still know little about *how*  
630 these genetic changes increase the risk of autism. A ‘computational ethology’<sup>76</sup> approach to social behavior  
631 analysis based on automatic posture tracking (such as pioneered in laboratory studies of insects, worms  
632 and fish<sup>20,77-82</sup> and in field ethology<sup>83-86</sup>) does not require us to *a priori* imagine how, e.g., autism-related  
633 gene perturbations manifest in mice, and can identify subtle changes in higher-order behavioral statistics

634 without human observer bias. By recording days of social interactions, it may be possible to use methods  
635 from computational topology to ask how the high-dimensional space defined by touch, posture and move-  
636 ment dynamics is impacted by different genotypes or pathological conditions. The statistical power and  
637 granularity of the long-term continuous 3D behavior data may allow us to identify what specific core  
638 components of social behaviors are altered in different social relations, by various neuroactive drugs, and  
639 in disease states<sup>53</sup>, and hopefully identify novel therapies for alleviating social dysfunction in patients.

640

#### 641 ***Moving towards real-time behavior tracking and electrophysiology***

642 Our algorithm is automatic, does not use any message-passing from future frames, and robustly recovers  
643 from tracking mistakes. Thus, it is possible in principle to run the algorithm in real-time. Currently, the  
644 processing time per frame is higher than the camera frame rate (60 frames/s), but the algorithm is also not  
645 yet fully optimized for speed. For example, in the current version of the algorithm, we first record the  
646 images to disk, and then read and pre-process the images later. This is convenient for algorithm develop-  
647 ment and exploration, but writing and reading the images to disk, and moving them onto and off a GPU  
648 are time-intensive steps. Beyond speed optimizations, tracking at a lower frame rate would allow more  
649 data processing time per frame. Going forward, it is important to explore ways to increase tracking ro-  
650 bustness further, such as using the optical flow between video frames to link key-points together in multi-  
651 animal tracking<sup>15</sup>, using a 3D convolutional neural network to detect body key-points by considering ‘up-  
652 projected’ views from all cameras around the behavioral arena simultaneously<sup>10</sup>, real-time painting-in of  
653 depth artifacts<sup>87</sup>, and better online trajectory forecasting with a network trained to propose trajectories  
654 based on previously tracked mouse movements. Experimentation and optimization is clearly needed, but  
655 our algorithm – requiring data transfer from only a few cameras, with deep convolutional networks, phys-  
656 ical modeling and particle filter tracking implemented as tensor algebra on the same GPU – is a promising  
657 starting point for the development of real-time, multi-animal 3D tracking, compatible with head mounted  
658 electrophysiology, e.g., for closed-loop experimental control triggered on behavioral and/or neural events.



## 659 References

- 660 1. Crusio, W. E., Sluyter, F. & Gerlai, R. T. Ethogram of the mouse. in *Behavioral Genetics of the*  
661 *Mouse* 17–22 (Cambridge University Press, 2013). doi:10.1017/CBO9781139541022.004.
- 662 2. Angelaki, D. E. *et al.* A gravity-based three-dimensional compass in the mouse brain. *Nat. Com-*  
663 *mun.* **11**, 1855 (2020).
- 664 3. Mimica, B., Dunn, B. A., Tombaz, T., Bojja, V. P. T. N. C. S. & Whitlock, J. R. Efficient cortical  
665 coding of 3D posture in freely behaving rats. *Science* **362**, 584–589 (2018).
- 666 4. Shemesh, Y. *et al.* High-order social interactions in groups of mice. *eLife* **2**, e00759 (2013).
- 667 5. Weissbrod, A. *et al.* Automated long-term tracking and social behavioural phenotyping of animal  
668 colonies within a semi-natural environment. *Nat. Commun.* **4**, 1–10 (2013).
- 669 6. Pereira, T. D. *et al.* Fast animal pose estimation using deep neural networks. *Nat. Methods* **16**, 117–  
670 125 (2019).
- 671 7. Mathis, A. *et al.* DeepLabCut: markerless pose estimation of user-defined body parts with deep  
672 learning. *Nat. Neurosci.* **21**, 1281–1289 (2018).
- 673 8. Graving, J. M. *et al.* DeepPoseKit, a software toolkit for fast and robust animal pose estimation us-  
674 ing deep learning. *eLife* **8**, e47994 (2019).
- 675 9. Zhang, L., Dunn, T., Marshall, J., Olveczky, B. & Linderman, S. Animal pose estimation from video  
676 data with a hierarchical von Mises-Fisher-Gaussian model. in *International Conference on Artificial*  
677 *Intelligence and Statistics* 2800–2808 (PMLR, 2021).
- 678 10. Dunn, T. W. *et al.* Geometric deep learning enables 3D kinematic profiling across species and envi-  
679 ronments. *Nat. Methods* **18**, 564–573 (2021).
- 680 11. Marshall, J. D. *et al.* Continuous Whole-Body 3D Kinematic Recordings across the Rodent Behav-  
681 iorual Repertoire. *Neuron* **109**, 420-437.e8 (2021).
- 682 12. Wu, A. *et al.* Deep Graph Pose: a semi-supervised deep graphical model for improved animal pose  
683 tracking. *bioRxiv* 2020.08.20.259705 (2020) doi:10.1101/2020.08.20.259705.
- 684 13. Liu, X. *et al.* OptiFlex: video-based animal pose estimation using deep learning enhanced by optical  
685 flow. *bioRxiv* 2020.04.04.025494 (2020) doi:10.1101/2020.04.04.025494.
- 686 14. Lauer, J. *et al.* Multi-animal pose estimation and tracking with DeepLabCut. *bioRxiv*  
687 2021.04.30.442096 (2021) doi:10.1101/2021.04.30.442096.
- 688 15. Pereira, T. D. *et al.* SLEAP: Multi-animal pose tracking. *bioRxiv* 2020.08.31.276246 (2020)  
689 doi:10.1101/2020.08.31.276246.
- 690 16. Chaumont, F. de *et al.* Real-time analysis of the behaviour of groups of mice via a depth-sensing  
691 camera and machine learning. *Nat. Biomed. Eng.* **3**, 930–942 (2019).
- 692 17. Hong, W. *et al.* Automated measurement of mouse social behaviors using depth sensing, video  
693 tracking, and machine learning. *Proc. Natl. Acad. Sci.* **112**, E5351–E5360 (2015).
- 694 18. Nilsson, S. R. O. *et al.* Simple Behavioral Analysis (SimBA): an open source toolkit for computer  
695 classification of complex social behaviors in experimental animals. *bioRxiv* 2020.04.19.049452  
696 (2020) doi:10.1101/2020.04.19.049452.
- 697 19. Segalin, C. *et al.* The Mouse Action Recognition System (MARS): a software pipeline for auto-  
698 mated analysis of social behaviors in mice. *bioRxiv* 2020.07.26.222299 (2020)  
699 doi:10.1101/2020.07.26.222299.
- 700 20. Walter, T. & Couzin, I. D. TRex, a fast multi-animal tracking system with markerless identification,  
701 2D body posture estimation and visual field reconstruction. *eLife* **10**:e64000 (2021).
- 702 21. Ebbesen, C. L. & Froemke, R. C. Body language signals for rodent social communication. *Curr.*  
703 *Opin. Neurobiol.* **68**, 91–106 (2021).
- 704 22. Nath, T. *et al.* Using DeepLabCut for 3D markerless pose estimation across species and behaviors.  
705 *Nat. Protoc.* **14**, 2152–2176 (2019).
- 706 23. Bala, P. C. *et al.* OpenMonkeyStudio: Automated Markerless Pose Estimation in Freely Moving  
707 Macaques. *bioRxiv* 2020.01.31.928861 (2020) doi:10.1101/2020.01.31.928861.
- 708 24. Batty, E. *et al.* BehaveNet: nonlinear embedding and Bayesian neural decoding of behavioral vid-  
709 eos. in *Advances in Neural Information Processing Systems* 32 (eds. Wallach, H. *et al.*) 15706–

- 710 15717 (Curran Associates, Inc., 2019).
- 711 25. Parker, P. R. L., Brown, M. A., Smear, M. C. & Niell, C. M. Movement-Related Signals in Sensory  
712 Areas: Roles in Natural Behavior. *Trends Neurosci.* **43**, 581–595 (2020).
- 713 26. Kropff, E., Carmichael, J. E., Moser, M.-B. & Moser, E. I. Speed cells in the medial entorhinal cor-  
714 tex. *Nature* **523**, 419–424 (2015).
- 715 27. Omrani, M., Kaufman, M. T., Hatsopoulos, N. G. & Cheney, P. D. Perspectives on classical contro-  
716 versies about the motor cortex. *J. Neurophysiol.* **118**, jn.00795.2016-jn.00795.2016 (2017).
- 717 28. Georgopoulos, A. P., Kalaska, J. F., Caminiti, R. & Massey, J. T. On the relations between the direc-  
718 tion of two-dimensional arm movements and cell discharge in primate motor cortex. *J. Neurosci.* **2**,  
719 1527–1537 (1982).
- 720 29. Kalaska, J. F. The representation of arm movements in postcentral and parietal cortex. *Can. J. Phys-  
721 iol. Pharmacol.* **66**, 455–463 (1988).
- 722 30. Matsumoto, J. *et al.* A 3D-Video-Based Computerized Analysis of Social and Sexual Interactions in  
723 Rats. *PLOS ONE* **8**, e78460 (2013).
- 724 31. Nakamura, T. *et al.* A Markerless 3D Computerized Motion Capture System Incorporating a Skele-  
725 ton Model for Monkeys. *PLOS ONE* **11**, e0166154 (2016).
- 726 32. Sheets, A. L., Lai, P.-L., Fisher, L. C. & Basso, D. M. Quantitative Evaluation of 3D Mouse Behav-  
727 iors and Motor Function in the Open-Field after Spinal Cord Injury Using Markerless Motion  
728 Tracking. *PLOS ONE* **8**, e74536 (2013).
- 729 33. Wiltschko, A. B. *et al.* Mapping Sub-Second Structure in Mouse Behavior. *Neuron* **88**, 1121–1135  
730 (2015).
- 731 34. Newell, A., Yang, K. & Deng, J. Stacked Hourglass Networks for Human Pose Estimation.  
732 *ArXiv160306937 Cs* (2016).
- 733 35. Günel, S. *et al.* DeepFly3D, a deep learning-based approach for 3D limb and appendage tracking in  
734 tethered, adult *Drosophila*. *eLife* **8**, e48571 (2019).
- 735 36. Cao, Z., Simon, T., Wei, S.-E. & Sheikh, Y. Realtime Multi-Person 2D Pose Estimation using Part  
736 Affinity Fields. *ArXiv161108050 Cs* (2017).
- 737 37. Shorten, C. & Khoshgoftaar, T. M. A survey on Image Data Augmentation for Deep Learning. *J.*  
738 *Big Data* **6**, 60 (2019).
- 739 38. Transtrum, M. K., Machta, B. B. & Sethna, J. P. Geometry of nonlinear least squares with applica-  
740 tions to sloppy models and optimization. *Phys. Rev. E* **83**, 036701 (2011).
- 741 39. Hart, J. C. Distance to an ellipsoid. in *Graphics Gems* (ed. Heckbert, P.) vol. 1994 113–119 (Aca-  
742 demic Press).
- 743 40. Kleinsteuber, M. & Hüper, K. Approximate Geometric Ellipsoid Fitting: A CG-Approach. in *Recent*  
744 *Advances in Optimization and its Applications in Engineering* (eds. Diehl, M., Glineur, F., Jarle-  
745 bring, E. & Michiels, W.) 73–82 (Springer, 2010). doi:10.1007/978-3-642-12598-0\_7.
- 746 41. Wang, W., Wang, J. & Kim, M.-S. An algebraic condition for the separation of two ellipsoids. *Com-  
747 put. Aided Geom. Des.* **18**, 531–539 (2001).
- 748 42. Choset, H. M. *Principles of robot motion: theory, algorithms, and implementation*. (MIT Press,  
749 2005).
- 750 43. Deutscher, J. & Reid, I. Articulated Body Motion Capture by Stochastic Search. *Int. J. Comput. Vis.*  
751 **61**, 185–205 (2005).
- 752 44. Paszke, A. *et al.* PyTorch: An Imperative Style, High-Performance Deep Learning Library. in *Ad-  
753 vances in Neural Information Processing Systems 32* (eds. Wallach, H. *et al.*) 8024–8035 (Curran  
754 Associates, Inc., 2019).
- 755 45. Sobol, I. M. On the distribution of points in a cube and the approximate evaluation of integrals.  
756 *USSR Comput. Math. Math. Phys.* **7**, 86–112 (1967).
- 757 46. Das, G. Top-k Algorithms and Applications. in *Database Systems for Advanced Applications* (eds.  
758 Zhou, X., Yokota, H., Deng, K. & Liu, Q.) 789–792 (Springer, 2009). doi:10.1007/978-3-642-  
759 00887-0\_74.
- 760 47. Murray, L. M., Lee, A. & Jacob, P. E. Parallel Resampling in the Particle Filter. *J. Comput. Graph.*  
761 *Stat.* **25**, 789–805 (2016).

- 762 48. Rauch, H. E., Tung, F. & Striebel, C. T. Maximum likelihood estimates of linear dynamic systems.  
763 *AIAA J.* **3**, 1445–1450 (1965).
- 764 49. Simon, D. *Optimal State Estimation: Kalman,  $H_\infty$ , and Nonlinear Approaches*. (John Wiley &  
765 Sons, Inc., 2006). doi:10.1002/0470045345.
- 766 50. Landis, M. F., Cheng, Y., Crassidis, J. L. & Oshman, Y. Averaging quaternions. *J. Guid. Control*  
767 *Dyn.* **30**, 1193–1197 (2007).
- 768 51. Berman, G. J., Choi, D. M., Bialek, W. & Shaevitz, J. W. Mapping the stereotyped behaviour of  
769 freely moving fruit flies. *J. R. Soc. Interface* **11**, 20140672 (2014).
- 770 52. Berman, G. J., Bialek, W. & Shaevitz, J. W. Predictability and hierarchy in *Drosophila* behavior.  
771 *Proc. Natl. Acad. Sci.* **113**, 11943–11948 (2016).
- 772 53. Wiltchko, A. B. *et al.* Revealing the structure of pharmacobehavioral space through motion se-  
773 quencing. *Nat. Neurosci.* 1–11 (2020) doi:10.1038/s41593-020-00706-3.
- 774 54. Barnett, S. A. *The rat: A study in behaviour*. xvi, 248 (Aldine, 1963).
- 775 55. Wolfe, J., Mende, C. & Brecht, M. Social facial touch in rats. *Behav. Neurosci.* **125**, 900–910  
776 (2011).
- 777 56. Bingham, E. *et al.* Pyro: Deep Universal Probabilistic Programming. *ArXiv181009538 Cs Stat*  
778 (2018).
- 779 57. Fox, E., Sudderth, E., Jordan, M. & Willsky, A. Bayesian Nonparametric Methods for Learning  
780 Markov Switching Processes. *IEEE Signal Process. Mag.* 5563110 (2010)  
781 doi:10.1109/MSP.2010.937999.
- 782 58. Ebbesen, C. L., Bobrov, E., Rao, R. P. & Brecht, M. Highly structured, partner-sex- and subject-sex-  
783 dependent cortical responses during social facial touch. *Nat. Commun.* **10**, 1–16 (2019).
- 784 59. Petersen, C. C. H. Sensorimotor processing in the rodent barrel cortex. *Nat. Rev. Neurosci.* **20**, 533–  
785 546 (2019).
- 786 60. Keysers, C., Kaas, J. H. & Gazzola, V. Somatosensation in social perception. *Nat. Rev. Neurosci.* **11**,  
787 417–428 (2010).
- 788 61. Lenschow, C. & Brecht, M. Barrel Cortex Membrane Potential Dynamics in Social Touch. *Neuron*  
789 **85**, 718–725 (2015).
- 790 62. Hardcastle, K., Maheswaranathan, N., Ganguli, S. & Giocomo, L. M. A Multiplexed, Heterogene-  
791 ous, and Adaptive Code for Navigation in Medial Entorhinal Cortex. *Neuron* **94**, 375–387.e7 (2017).
- 792 63. Díaz López, B. When personality matters: personality and social structure in wild bottlenose dol-  
793 phins, *Tursiops truncatus*. *Anim. Behav.* **163**, 73–84 (2020).
- 794 64. Tao, L., Ozarkar, S., Beck, J. M. & Bhandawat, V. Statistical structure of locomotion and its modu-  
795 lation by odors. *eLife* **8**, e41235 (2019).
- 796 65. Concha-Miranda, M., Hartmann, K., Reinhold, A., Brecht, M. & Sanguinetti-Scheck, J. I. Play, but  
797 not observing play, engages rat medial prefrontal cortex. *Eur. J. Neurosci.* **n/a**, (2020).
- 798 66. Carrillo, M. *et al.* Emotional Mirror Neurons in the Rat’s Anterior Cingulate Cortex. *Curr. Biol.* **29**,  
799 1301–1312.e6 (2019).
- 800 67. Kilner, J. M. & Lemon, R. N. What We Know Currently about Mirror Neurons. *Curr. Biol.* **23**,  
801 R1057–R1062 (2013).
- 802 68. Hickok, G. Do mirror neurons subserve action understanding? *Neurosci. Lett.* **540**, 56–58 (2013).
- 803 69. Keysers, C. & Gazzola, V. Neural Correlates of Empathy in Humans, and the Need for Animal  
804 Models. in *Neuronal Correlates of Empathy* 37–52 (Elsevier, 2018). doi:10.1016/B978-0-12-  
805 805397-3.00004-8.
- 806 70. Tombaz T, Dunn BA, Hovde K, Cubero RJ, Mimica B, Mamidanna P, Roudi Y, & Whitlock JR. Ac-  
807 tion representation in the mouse parieto-frontal network. *Sci Rep.* **10**:5559 (2020).
- 808 71. Carcea, I., *et al.* Oxytocin neurons enable social transmission of maternal behaviour. *Nature*  
809 **596**:553–557 (2021).
- 810 72. Sargolini, F. *et al.* Conjunctive representation of position, direction, and velocity in entorhinal cor-  
811 tex. *Science* **312**, 758–62 (2006).
- 812 73. Porcelli, S. *et al.* Social brain, social dysfunction and social withdrawal. *Neurosci. Biobehav. Rev.*  
813 **97**, 10–33 (2019).

- 814 74. Uchino, B. N. *et al.* Social support, social integration, and inflammatory cytokines: A meta-analysis.  
815 *Health Psychol.* **37**, 462–471 (2018).
- 816 75. Che, X., Cash, R., Ng, S. K., Fitzgerald, P. & Fitzgibbon, B. M. A Systematic Review of the Pro-  
817 cesses Underlying the Main and the Buffering Effect of Social Support on the Experience of Pain.  
818 *Clin. J. Pain* **34**, 1061–1076 (2018).
- 819 76. Anderson, D. J. & Perona, P. Toward a Science of Computational Ethology. *Neuron* **84**, 18–31  
820 (2014).
- 821 77. Gal, A., Saragosti, J. & Kronauer, D. J. anTraX, a software package for high-throughput video  
822 tracking of color-tagged insects. *eLife* **9**, e58145 (2020).
- 823 78. Bozek, K., Hebert, L., Portugal, Y., Mikheyev, A. S. & Stephens, G. J. Markerless tracking of an  
824 entire honey bee colony. *Nat. Commun.* **12**, 1733 (2021).
- 825 79. Imirzian, N. *et al.* Automated tracking and analysis of ant trajectories shows variation in forager ex-  
826 ploration. *Sci. Rep.* **9**, 13246 (2019).
- 827 80. Klibaite, U., Berman, G. J., Cande, J., Stern, D. L. & Shaevitz, J. W. An unsupervised method for  
828 quantifying the behavior of paired animals. *Phys. Biol.* **14**, 015006 (2017).
- 829 81. Franks, N. R. *et al.* Social behaviour and collective motion in plant-animal worms. *Proc. R. Soc. B*  
830 *Biol. Sci.* **283**, 20152946 (2016).
- 831 82. Rosenthal, S. B., Twomey, C. R., Hartnett, A. T., Wu, H. S. & Couzin, I. D. Revealing the hidden  
832 networks of interaction in mobile animal groups allows prediction of complex behavioral contagion.  
833 *Proc. Natl. Acad. Sci.* **112**, 4690–4695 (2015).
- 834 83. Adam, T. *et al.* Joint modelling of multi-scale animal movement data using hierarchical hidden  
835 Markov models. *Methods Ecol. Evol.* **10**, 1536–1550 (2019).
- 836 84. Strandburg-Peshkin, A., Farine, D. R., Couzin, I. D. & Crofoot, M. C. Shared decision-making  
837 drives collective movement in wild baboons. *Science* **348**, 1358–1361 (2015).
- 838 85. Patterson, T. A. *et al.* Statistical modelling of individual animal movement: an overview of key  
839 methods and a discussion of practical challenges. *ArXiv160307511 Q-Bio Stat* (2017).
- 840 86. Smith, J. E. & Pinter-Wollman, N. Observing the unwatchable: Integrating automated sensing, natu-  
841 ralistic observations and animal social network analysis in the age of big data. *J. Anim. Ecol.* **n/a**,  
842 (2020).
- 843 87. Gillis, W. *et al.* Revealing elements of naturalistic reinforcement learning through closed-loop ac-  
844 tion identification. in *2019 Neuroscience Meeting Planner Program No. 146.17* (Society for Neuro-  
845 science, 2019).
- 846 88. Kamada, T. & Kawai, S. An algorithm for drawing general undirected graphs. *Inf. Process. Lett.* **31**,  
847 7–15 (1989).
- 848 89. Sayed, A. & Kailath, T. Recursive Least-Squares Adaptive Filters. in *Digital Signal Processing*  
849 *Fundamentals* vol. 20094251 1–40 (CRC Press, 2009).
- 850 90. Blei, D. M., Kucukelbir, A. & McAuliffe, J. D. Variational Inference: A Review for Statisticians. *J.*  
851 *Am. Stat. Assoc.* **112**, 859–877 (2017).
- 852 91. Franklin, K. B. J. & Paxinos, G. *The mouse brain in stereotaxic coordinates.* (2019).
- 853 92. Vöröslakos, M. *et al.* 3D-printed recoverable microdrive and base plate system for rodent electro-  
854 physiology. (2021).
- 855 93. Siegle, J. H. *et al.* Open Ephys: an open-source, plugin-based platform for multichannel electro-  
856 physiology. *J. Neural Eng.* **14**, 045003 (2017).
- 857 94. Yger, P. *et al.* A spike sorting toolbox for up to thousands of electrodes validated with ground truth  
858 recordings in vitro and in vivo. *eLife* **7**, 1–23 (2018).
- 859 95. Rossant, C. *et al.* Spike sorting for large, dense electrode arrays. *Nat. Neurosci.* **19**, 634–641 (2016).
- 860 96. Larsson, J. eulerr: Area-Proportional Euler and Venn Diagrams with Ellipses. [https://cran.r-pro-](https://cran.r-project.org/web/packages/eulerr/citation.html)  
861 [ject.org/web/packages/eulerr/citation.html](https://cran.r-project.org/web/packages/eulerr/citation.html) (2020).
- 862 97. Hagberg, A. A., Schult, D. A. & Swart, P. J. Exploring Network Structure, Dynamics, and Function  
863 using NetworkX. **5** (2008).



864 **Acknowledgements**

865 This work was supported by The Novo Nordisk Foundation (C.L.E.), the NIH (DC012557, HD088411,  
866 and NS107616 to R.C.F.), and a Howard Hughes Medical Institute Faculty Scholarship (R.C.F.). We thank  
867 György Buzsáki, David Tingley, and Manuel Valero for help in establishing silicon probe recordings and  
868 for the gift of 3D printed silicon drive parts.

869

870 **Author Contributions**

871 C.L.E. designed and implemented the system, performed experiments, analyzed the data, made figures,  
872 and wrote the first version of the manuscript. R.C.F. supervised the study. C.L.E and R.C.F. wrote the  
873 manuscript.

874

875 **Competing Interests**

876 The authors declare no competing interests.

877

878 **Data and Code Availability**

879 All code (the recording software and all analysis code) and an example dataset were submitted with this  
880 manuscript. All code will be available in a dedicated Github repository before or upon publication, the  
881 example dataset will be deposited on Zenodo.

882 **Figures**

**and**

**Legends**

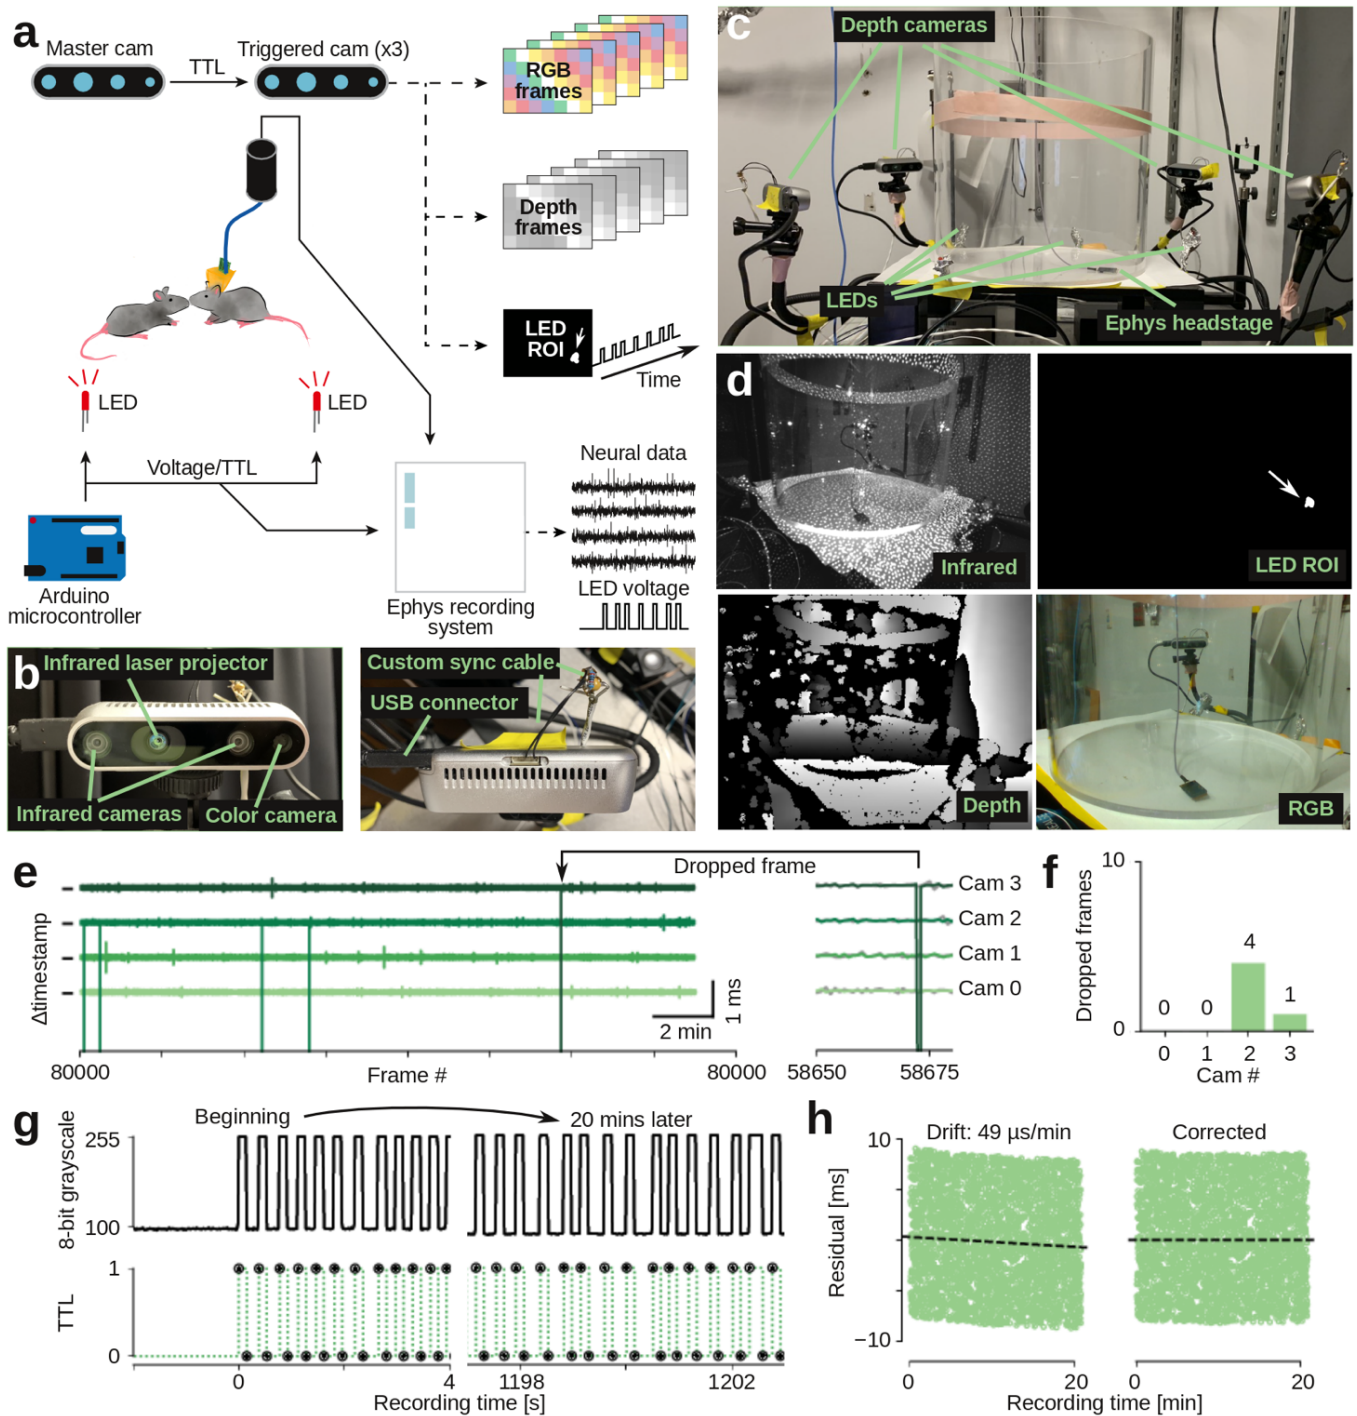

883

884 **Figure 1. Raw data acquisition, temporal alignment and recording stability.** a, Schematic of recording  
 885 setup, showing flow of synchronization pulses and raw data. We use a custom Python program to record  
 886 RGB images, depth images, and state (on/off) of synchronization LEDs from all four cameras. Neural data  
 887 and TTL state of LEDs are recorded with a standard electrophysiology recording system. We use a custom

888 Python program to record video frames over USB (60 frames/s) and automatically deliver LED synchro-  
889 nization pulses with randomized delays via Arduino microcontroller. **b**, Close-up images of the depth  
890 cameras, showing the two infrared sensors, color sensor, and cables for data transfer and synchronization.  
891 **c**, Photograph of recording setup, showing the four depth cameras, synchronization LEDs, and circular  
892 behavioral arena (transparent acrylic, 12" diameter). **d**, Example raw data images (top left: single infrared  
893 image with visible infrared laser dots; top right: corresponding automatically-generated mask image for  
894 recording LED synchronization state (arrow, LED location); bottom left: corresponding depth image, es-  
895 timated from binocular disparity between two infrared images; bottom right: corresponding color image).  
896 **e**, Inter-frame-interval from four cameras (21 min of recording). Vertical ticks indicate 16.66 ms (corre-  
897 sponding to 60 frames/s), individual cameras are colored and vertically offset. Frame rate is very stable  
898 (jitter across all cameras:  $\pm 26 \mu\text{s}$ ). Arrow, example dropped frame. **f**, Number of dropped frames across  
899 the example 21 min recording. **g**, Top row, LED state (on/off) as captured by one camera (the 8-bit value  
900 of central pixel of LED ROI mask), at start of recording and after 20 minutes of recording. Bottom row,  
901 aligned LED trace, as recorded by electrophysiology recording system. **h**, Temporal residuals between  
902 recorded camera LED trace (**g**, top) and recorded TTL LED trace (**g**, bottom) are stable, but drift slightly  
903 (49  $\mu\text{s}/\text{min}$ , left panel). We can automatically detect and correct for this small drift (right panel).

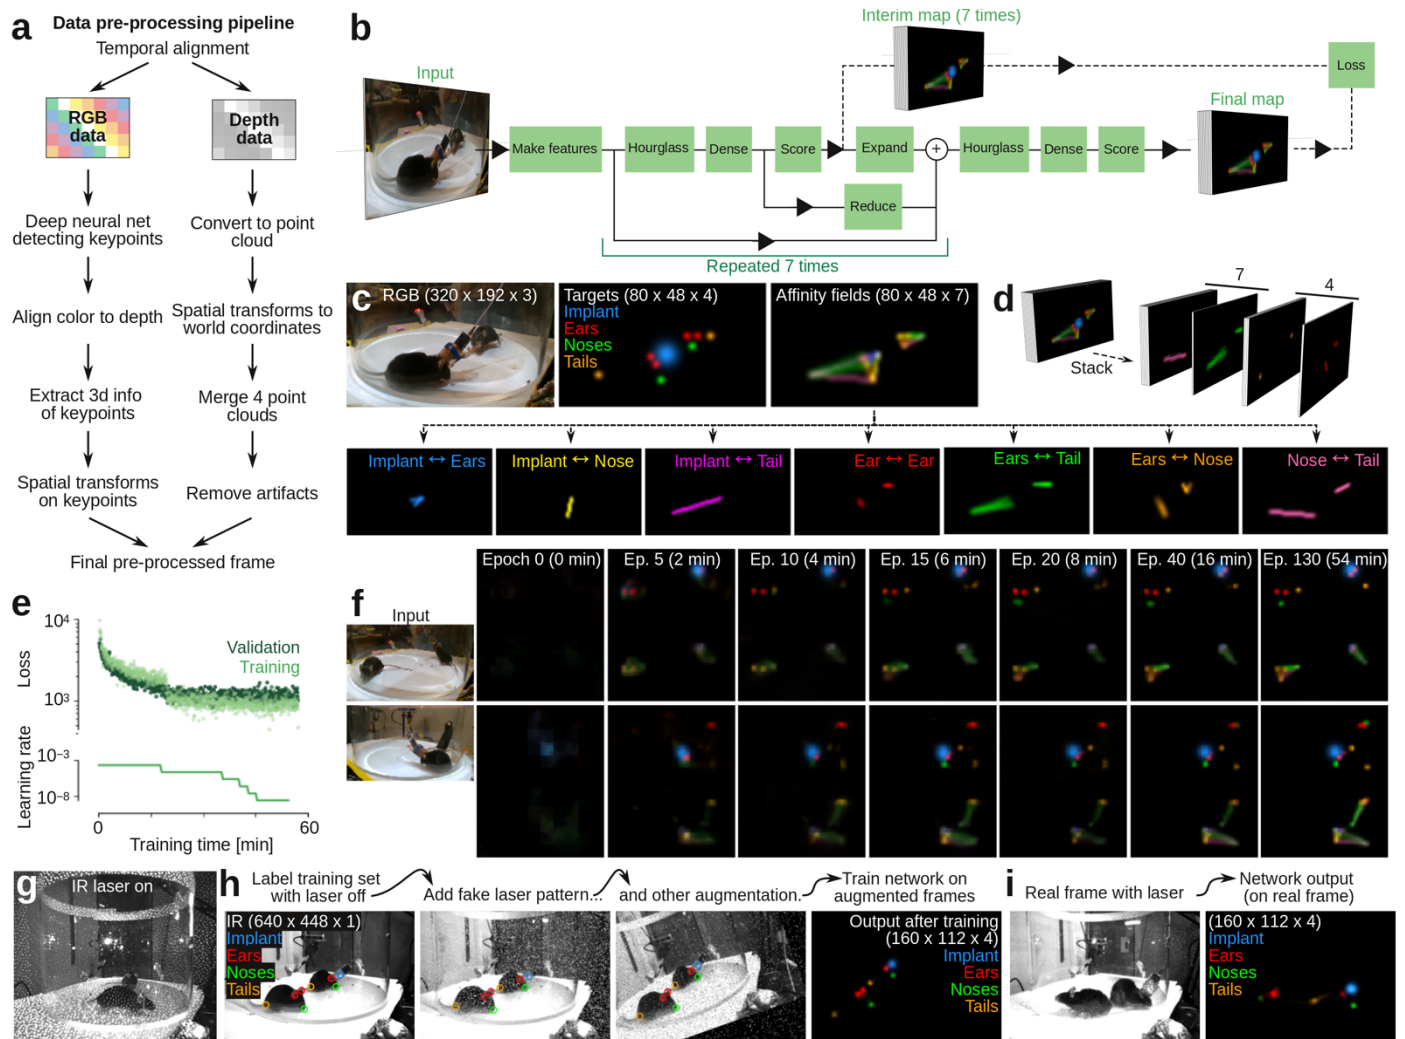

904

905 **Figure 2. Detection of body key-points with a deep convolutional neural network.** **a**, Workflow for  
 906 pre-processing of raw image data. **b**, The ‘stacked hourglass’ convolutional network architecture. Each  
 907 ‘hourglass’ block of the network uses pooling and upsampling to incorporate both fine (high-resolution)  
 908 and large-scale (low-resolution) information in the target prediction. The hourglass and scoring blocks are  
 909 repeated seven times (seven ‘stacks’), such that intermediate key-point and affinity field predictions feed  
 910 into subsequent hourglass blocks. Both the intermediate and final target maps contribute to the training  
 911 loss, but only the final output map is used for prediction. **c**, Example training data for the deep convolu-  
 912 tional neural network. The network is trained to output four types of body key-points (Implant, Ears, Noses,  
 913 Tails) and seven 1-D affinity fields, connecting key-points within each body. **d**, Example of full training  
 914 target tensor. **e**, Convergence plot of example training set. Top, loss function for each mini-batch of the  
 915 training set (526 images) and validation set (50 images). Bottom, learning rate. Network loss is trained  
 916 (plateaued) after ~ 60 minutes. **f**, Network performance as function of training epoch for two example



917 images in the validation set. Left, input images; right, final output maps for key-points and affinity fields.  
918 **g**, In an infrared frame (under infrared illumination), the clear view of the mice is ‘obstructed’ by the  
919 infrared laser dot pattern. **h**, Example labeled training frame (with the laser turned off), showing the aug-  
920 mentation strategy of applying a probabilistically generated ‘fake’ laser dot pattern during training. **i**, Ex-  
921 ample network output of the trained network on a ‘real’ infrared frame with the infrared laser turned on.

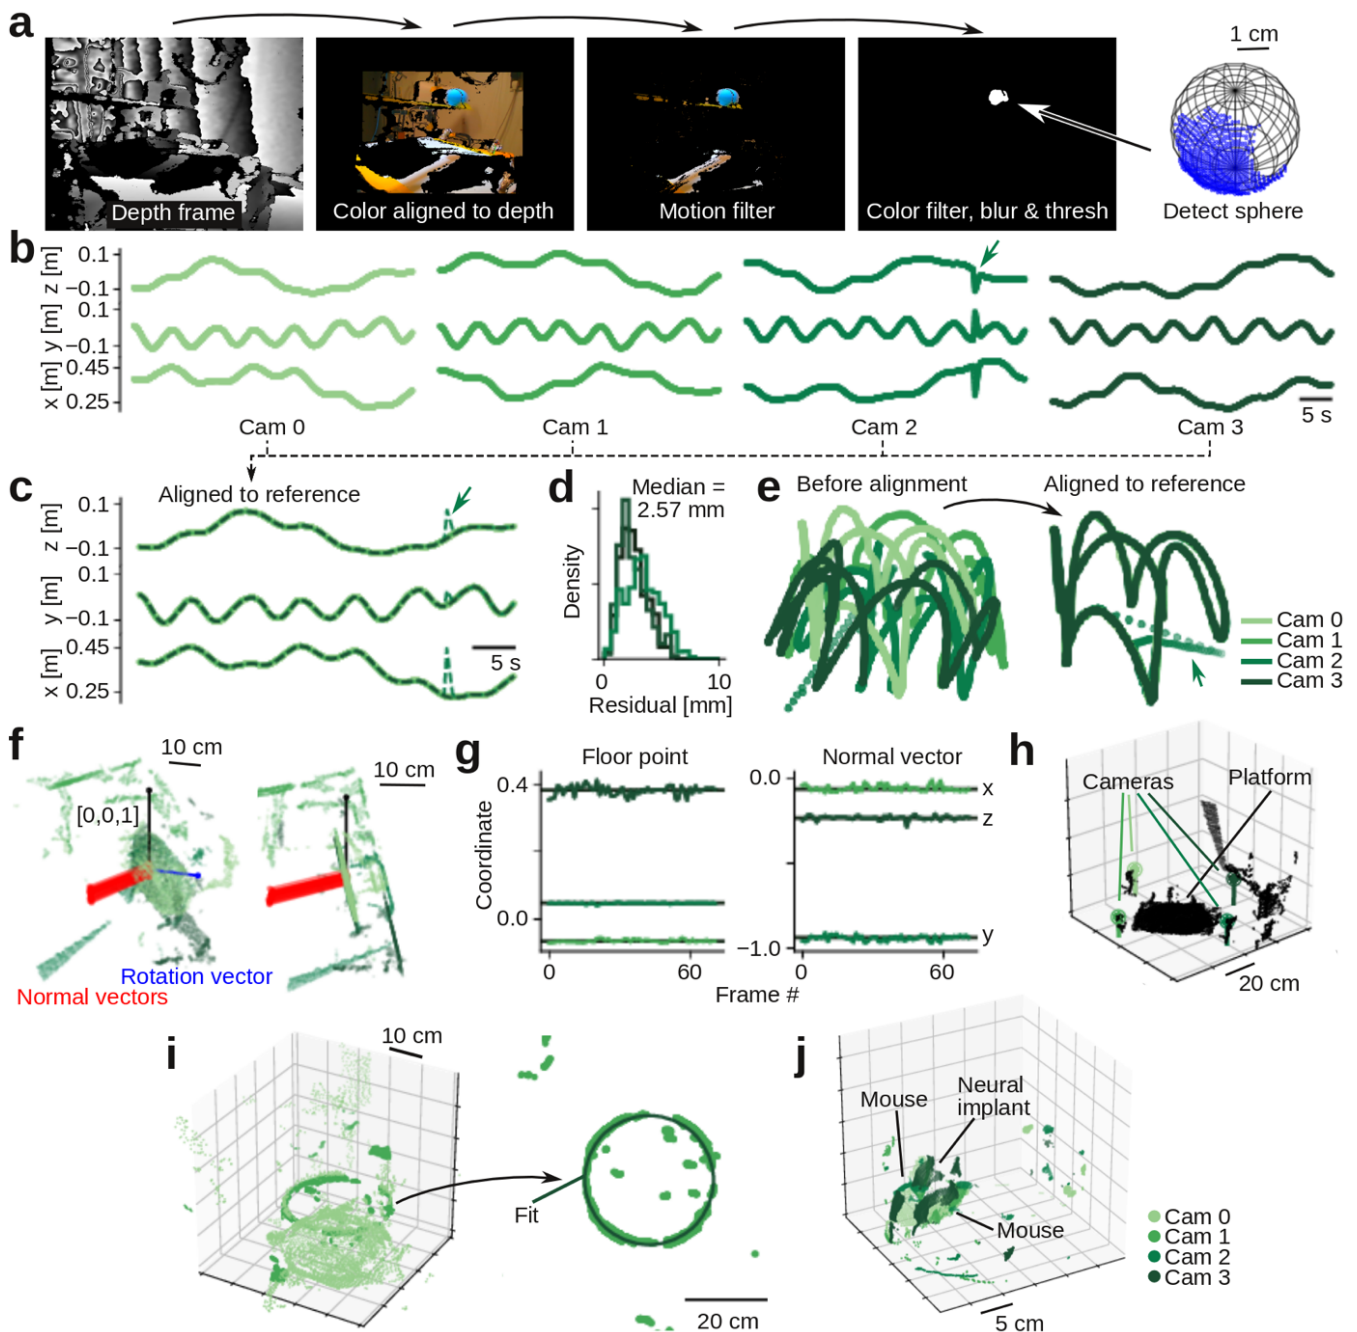

922

923 **Figure 3. Depth data alignment and pre-processing.** **a**, Calibration ball detection pipeline. We use a  
 924 combination of motion filtering, color filtering, and smoothing filters to detect and extract 3D ball surface.  
 925 We estimate 3D location of the ball by fitting a sphere to the extracted surface. **b**, Estimated 3D trajectories  
 926 of calibration ball as seen by the four cameras. One trajectory has an error (arrow) where ball trajectory  
 927 was out of view. **c**, Overlay of trajectories after alignment in time and space. Our alignment pipeline uses  
 928 a robust regression method and is insensitive to errors (arrow) in the calibration ball trajectory. **d**, Distri-  
 929 bution of residuals, using cam 0 as reference. **e**, Estimated trajectory in 3D space, before and after align-  
 930 ment of camera data. **f**, Example frame used in automatic detection of the behavioral arena location. Show

931 are pixels from the four cameras, after alignment (green), estimated normal vectors to the behavioral plat-  
932 form floor (red), the estimated rotation vector (blue), and the reference vector (unit vector along z-axis,  
933 black). **g**, Estimated location (left) and normal vector (right) to the behavioral platform floor, across 60  
934 random frames. **h**, Example frame, after rotating the platform into the xy-plane, and removing pixels be-  
935 low and outside the arena. Inferred camera locations are indicated with stick and ball. **i**, Automatic detec-  
936 tion of behavioral arena location. **j**, Example 3D frame, showing merged data from four cameras, after  
937 automatic removal of the arena floor and imaging artifacts induced by the acrylic cylinder. Colors, which  
938 camera captured the pixels.

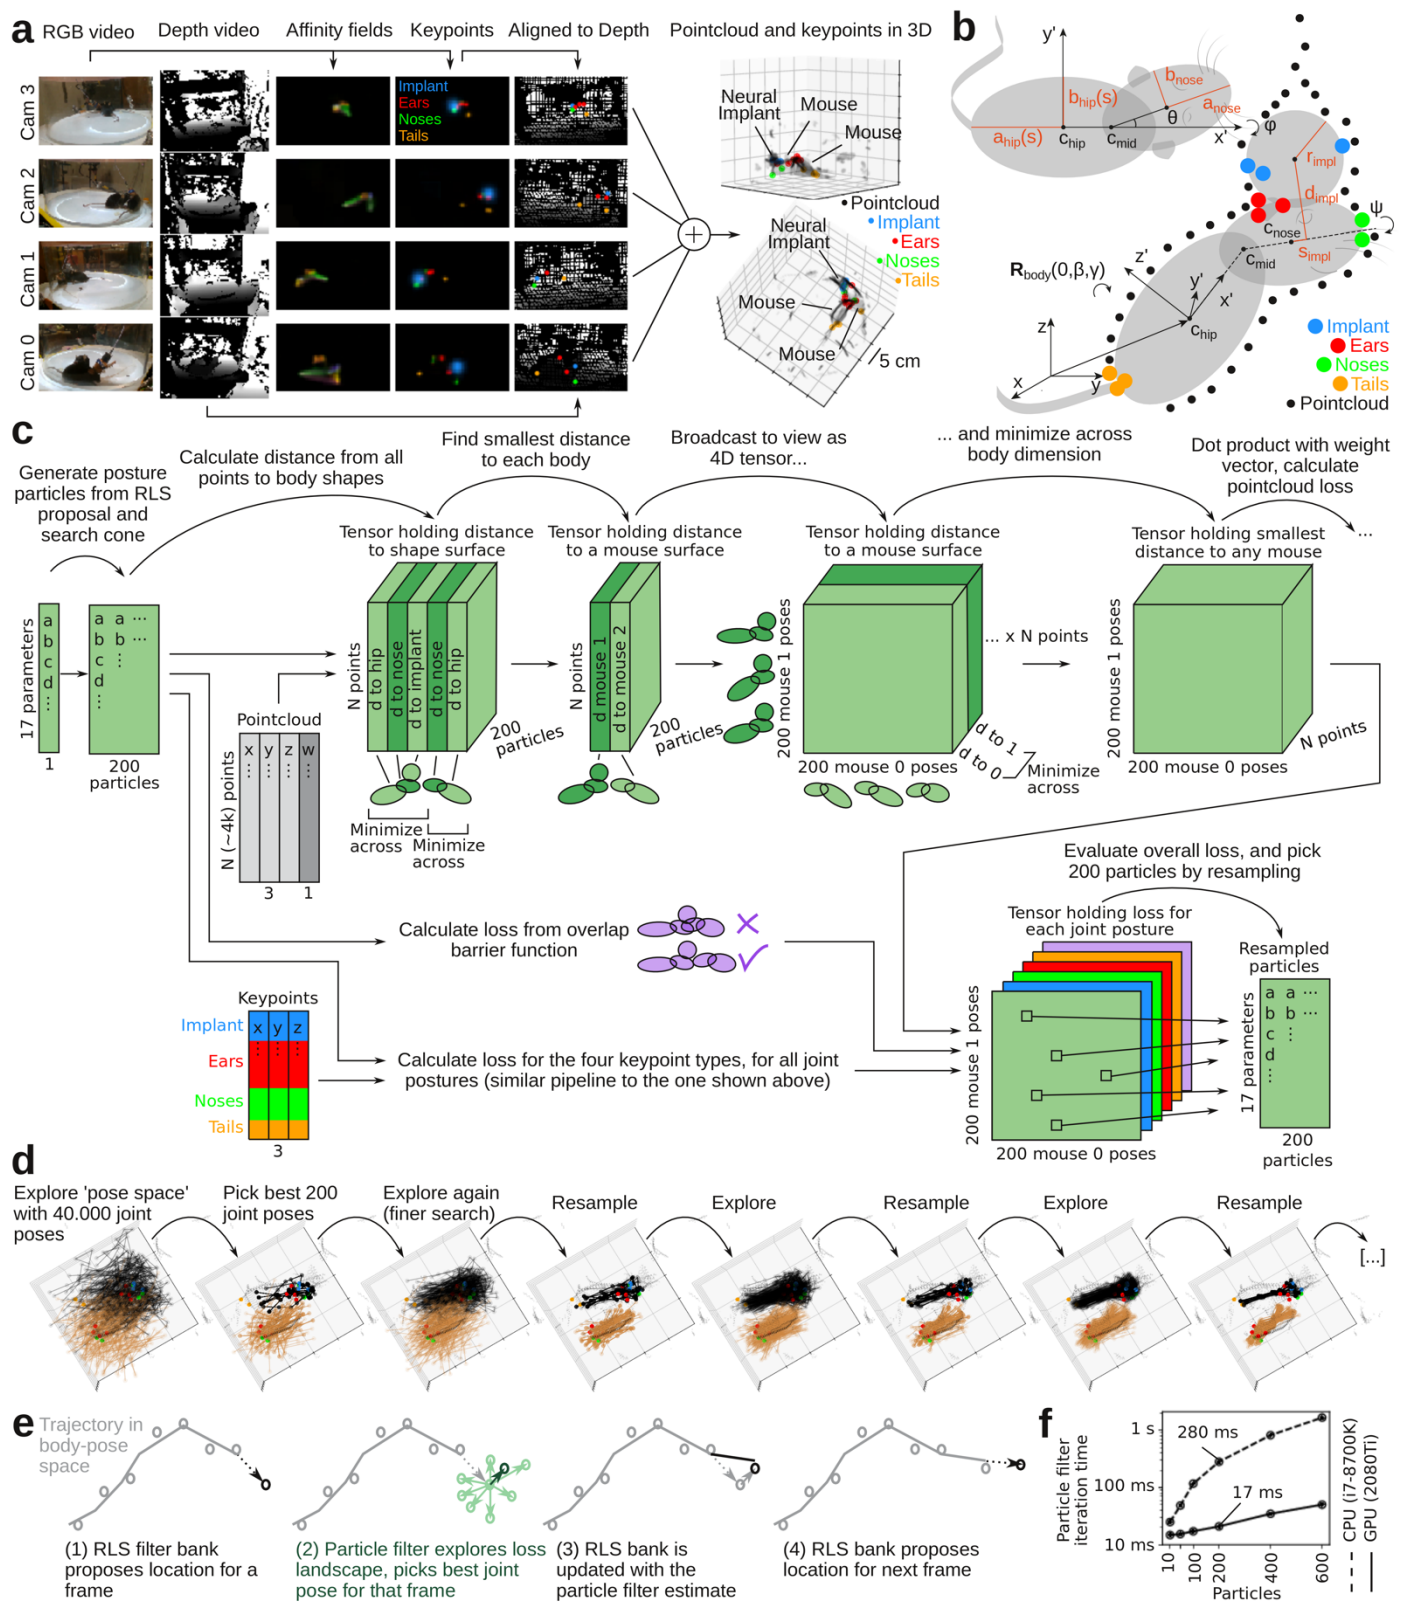

939

940 **Figure 4. Mouse body model and GPU-accelerated tracking algorithm.** **a**, Full assembly pipeline for  
 941 a single pre-processed data frame, going from raw RGB and depth images (left columns) to assembled 3D  
 942 point-cloud (black dots, right) and body key-point positions in 3D space (colored dots, right). **b**, Schematic  
 943 depiction of mouse body model (grey, deformable ellipsoids) and implant model (grey sphere), fit to point-

944 cloud (black dots) and body key-points (colored dots). The loss function assigns loss to distance from the  
945 point-cloud to the body model surface (black arrows) and from key-point locations to landmark locations  
946 on the body model (e.g., from nose key-points to the tip of the nose ellipsoids; colored arrows). **c**, Sche-  
947 matic of loss function calculation and tracking algorithm. All operations implemented as GPU-accelerated  
948 tensor algebra. **d**, Example steps showing convergence of the particle filter on a single frame. **e**, Iteration  
949 time of a particle filter step, as a function of particles, on a GPU and CPU. For 200 particles (i.e. 40.000  
950 joint poses), the GPU-accelerated particle filter is ~16.5 times faster than the CPU **f**, Schematic depiction  
951 of the two levels of the tracking algorithm: Within a single frame, the joint poses are estimated with the  
952 particle filter. Between frames, the RLS filter bank incorporates information from multiple previous  
953 frames to estimate and propose the minimum in ‘pose space’.

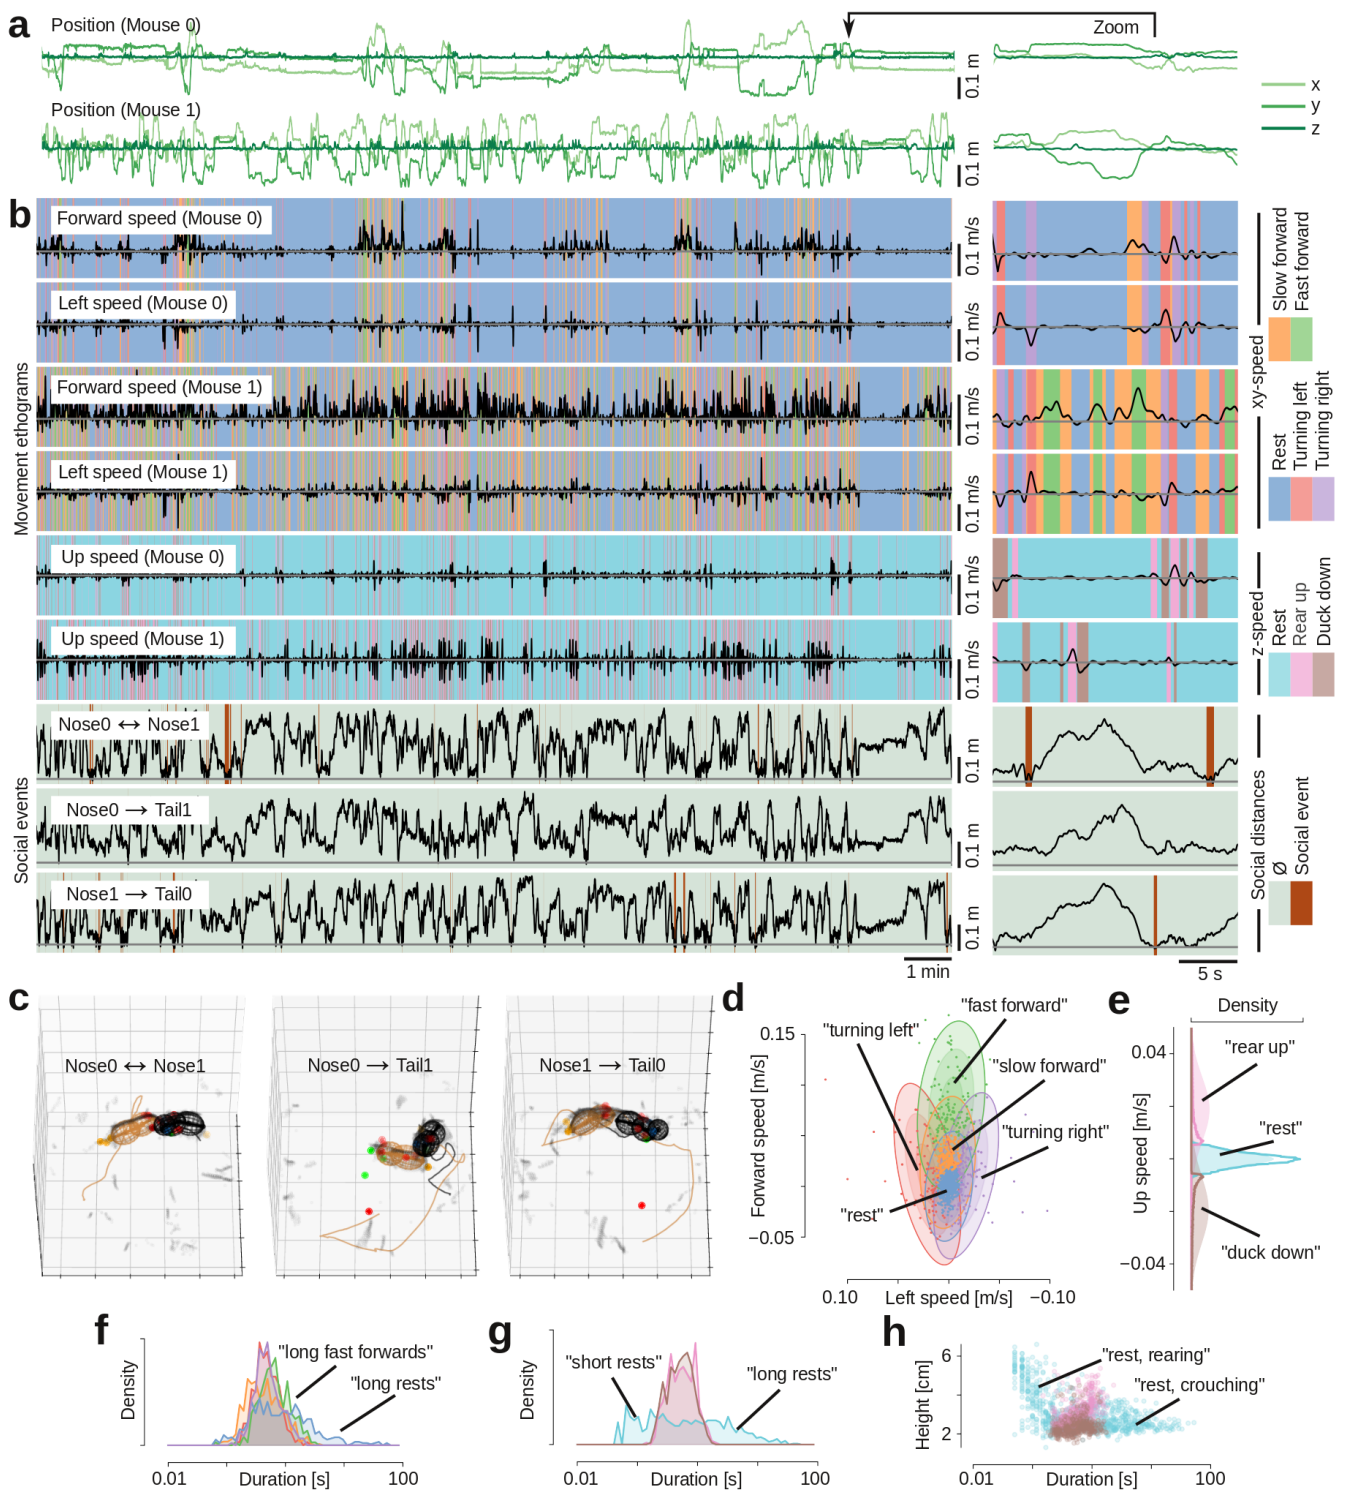

954

955 **Figure 5. Automatic classification of movement patterns and behavioral states during social inter-**

956 **actions. a**, Tracked position of both mice, across an example 21 min recording. **b**, Extracted behavioral

957 features: three speed components (forward, left and up in the mice's egocentric reference frames), and

958 three 'social distances' (nose-to-nose distance and two nose-to-tail distances). Colors indicate ethograms

959 of automatically detected behavioral states. **c**, Examples of identified social events: nose-to-nose-touch,



960 and anogenital nose-contacts. **e**, Mean and covariance (3 standard deviations indicated by ellipsoids) for  
961 each latent state for the forward/leftward running (dots indicate a subsample of tracked speeds, colored by  
962 their most likely latent state) **e**, Mean and variance of latent states in the  $z$ -plane (shaded color) as well as  
963 distribution of tracked data assigned to those latent states (histograms) **f**, Distribution of the duration of  
964 the five behavioral states in the  $xy$ -plane. Periods of rest (blue) are the longest ( $p < 0.05$ , Mann-Whitney  
965 U-test) and bouts of fast forward movement (green) are to be longer other movement bouts ( $p < 0.001$ ,  
966 Mann-Whitney U-test). **g**, Distribution of duration of the three behavioral states in the  $z$ -plane. Periods of  
967 rest (light blue) are either very short or very long. **h**, Plot of body elevation against behavior duration.  
968 Short periods of rest happen when the  $z$ -coordinate is high (the mouse rears up, waits for a brief moment  
969 before ducking back down), whereas long periods of rest happen when the  $z$ -coordinate is low (when the  
970 mouse is resting or moving around the arena,  $\rho = -0.47$ ,  $p < 0.001$ , Spearman rank).



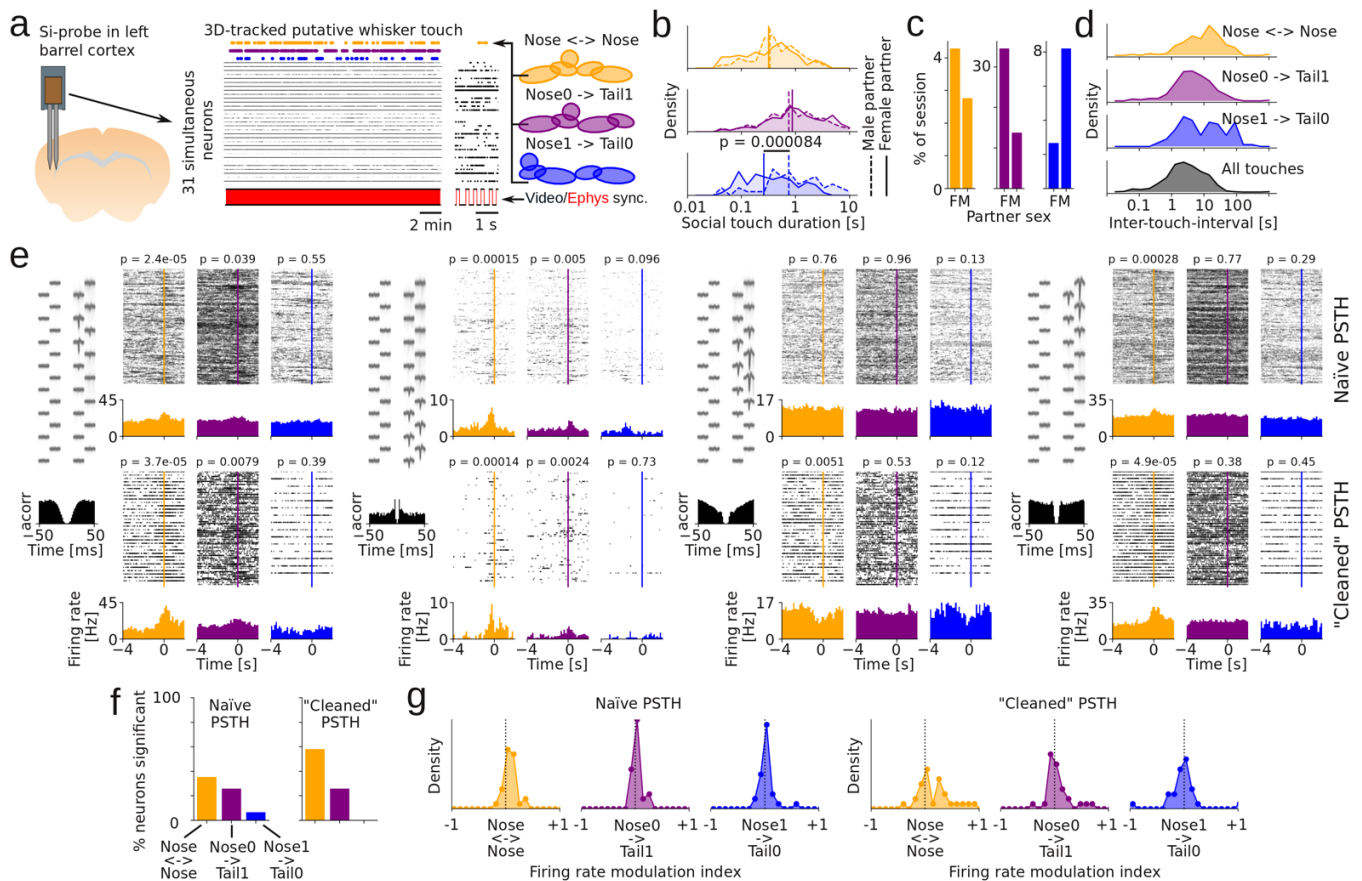

971

972 **Figure 6. Automatic measurement of firing rate modulations during social touch.** **a**, Automatically-  
 973 detected social touch events in mouse implanted with silicon probe (Si-probe) with 31 single-units from  
 974 barrel cortex during a single 20-minute behavioral session. Yellow, nose-to-nose; purple, implanted-nose-  
 975 to-partner-tail; blue, partner-nose-to-implanted-tail. **b**, Distribution of touch durations with male (dashed)  
 976 and female (solid) partner. **c**, Percentage of behavioral session classified as social touch events, by partner  
 977 sex, for two behavioral sessions. **d**, Distribution of inter-touch-intervals for the two example behavioral  
 978 sessions. **e**, Social touch PSTHs for four neurons. For each neuron, the top row shows ‘naïve’ PSTHs  
 979 (aligned to social touch event) and the bottom row shows ‘cleaned’ PSTHs (we only include events where  
 980 no other social touch event occurred in the  $-4$  s to 0 s period before the detected social touch). The PSTHs  
 981 in the bottom row have fewer trials, but show much larger effect sizes. **f**, Percentage of neurons that pass  
 982 a  $p < 0.05$  significance criterion, based on the ‘naïve’ and ‘cleaned’ PSTHs shown above. **g**, Distributions  
 983 of effect size (measured as a firing rate modulation index), based on the ‘naïve’ and ‘cleaned’ PSTHs  
 984 shown above.

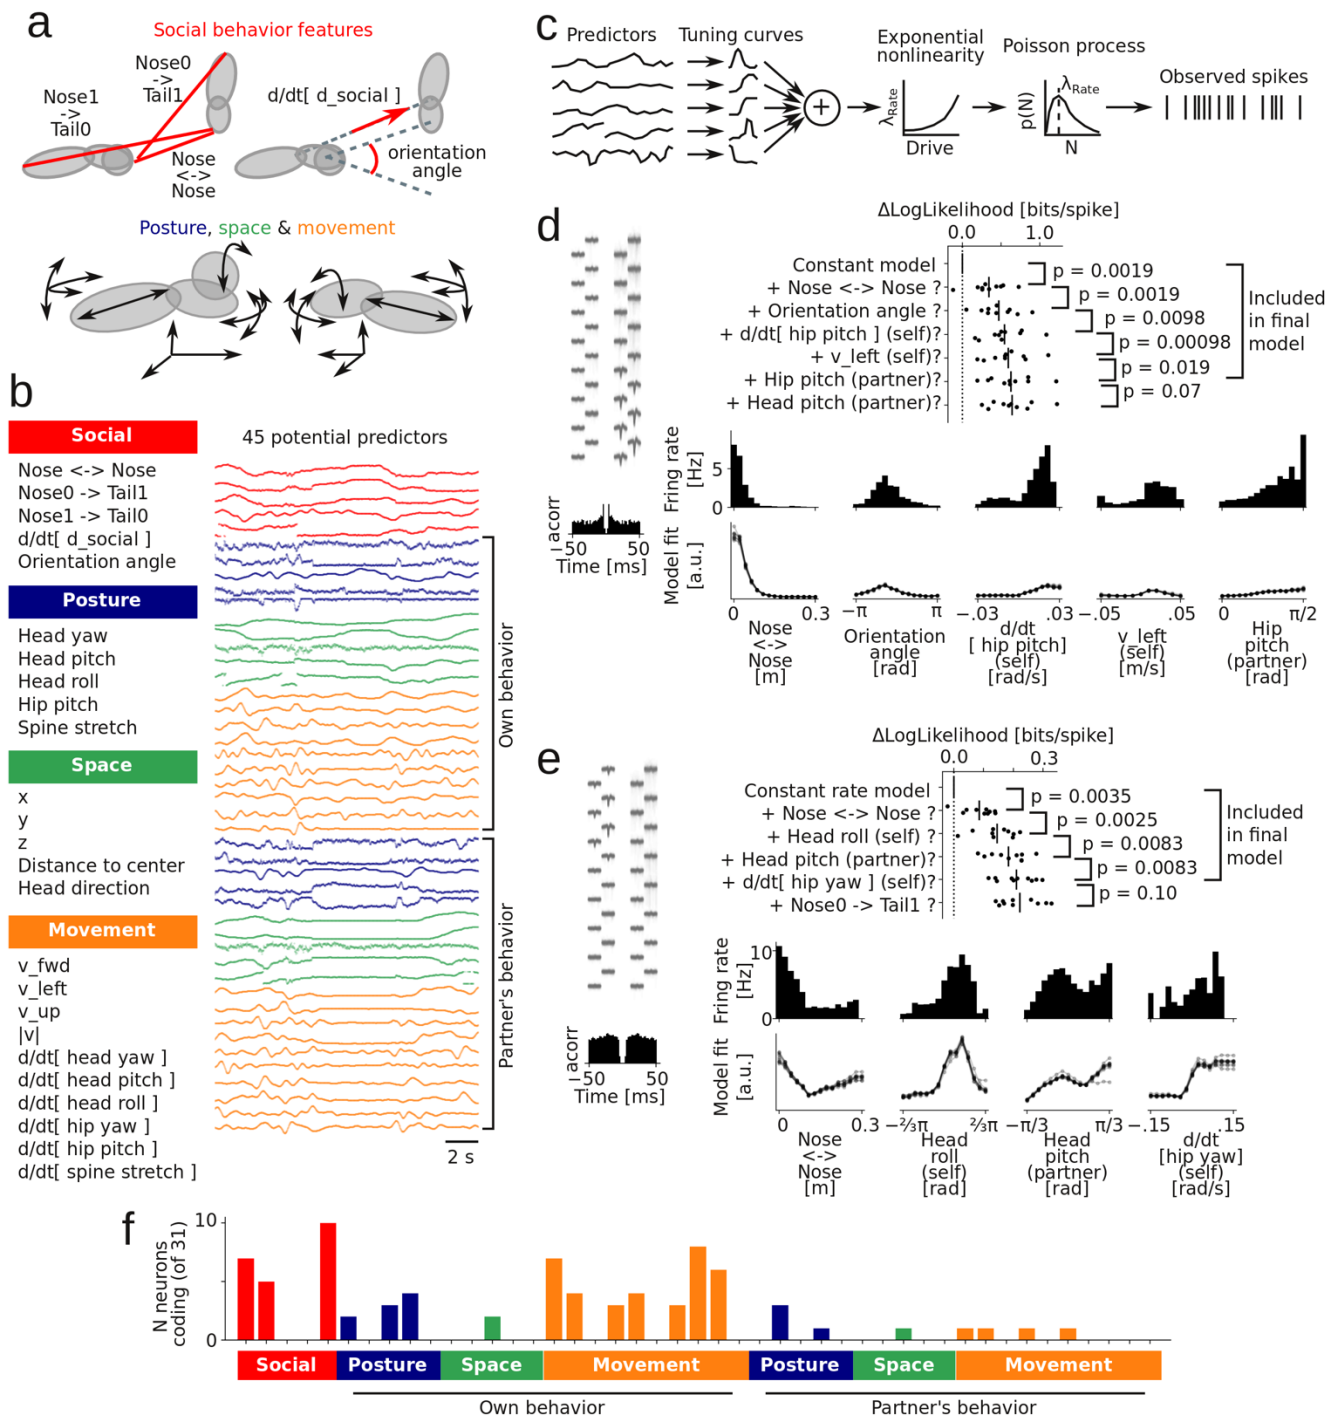

985

986 **Figure 7. Automatic mapping of neural receptive fields in a natural ‘social situation’.** a, Schematic  
 987 depiction of automatically extracted social features (top: nose-to-nose and nose-to-tail distances, center-  
 988 to-center velocity and head-center-to-head-center angle) and movement/posture features (bottom: rotation  
 989 and movement of the body model ellipsoids). b, Names and example traces of extracted behavioral fea-  
 990 tures: social features (red color) and movement (yellow), posture (blue) and spatial (green) features, for  
 991 both the subject and partner animal. c, Schematic depiction of the generative model: We assume that every

992 behavioral feature (‘predictor’) is associated with a tuning curve and that spikes are generated by a Poisson  
993 process. **d**, Model selection history (with associated p-values of each included predictor) for an example  
994 neuron (average spike shape and ISI-histogram shown to the left). The ‘raw’ marginal firing rate distribu-  
995 tion (bars), and the fitted multiplexed tuning curves (10 lines, one line for each data fold) of the identified  
996 predictors are shown below. The barrel cortex neuron multiplexes five features, including nose-to-nose  
997 distance (the neuron fires more when this is close to zero, i.e., when noses touch) and orientation angle  
998 (the neuron fires most at roughly  $-\pi/2$ , i.e., when the partner is on the right side, the contralateral side  
999 relative to the recording electrode). **e**, Another example neuron (same plots as in **d**). This barrel cortex  
1000 neuron multiplexes four features: during nose-to-nose touch, when turning or rolling the head to the right,  
1001 when partner’s nose is tilted up, or when partner’s nose is slightly downwards. **f**, Distribution of the num-  
1002 ber of neurons that encode the tested behavioral features (ordering as in **b**). The neurons mainly encoded  
1003 social touch features (nose-to-nose, implanted-nose-to-partner-tail and orientation angle) and move-  
1004 ment/posture features of the implanted animal itself (blue and yellow bars, above ‘own behavior’).

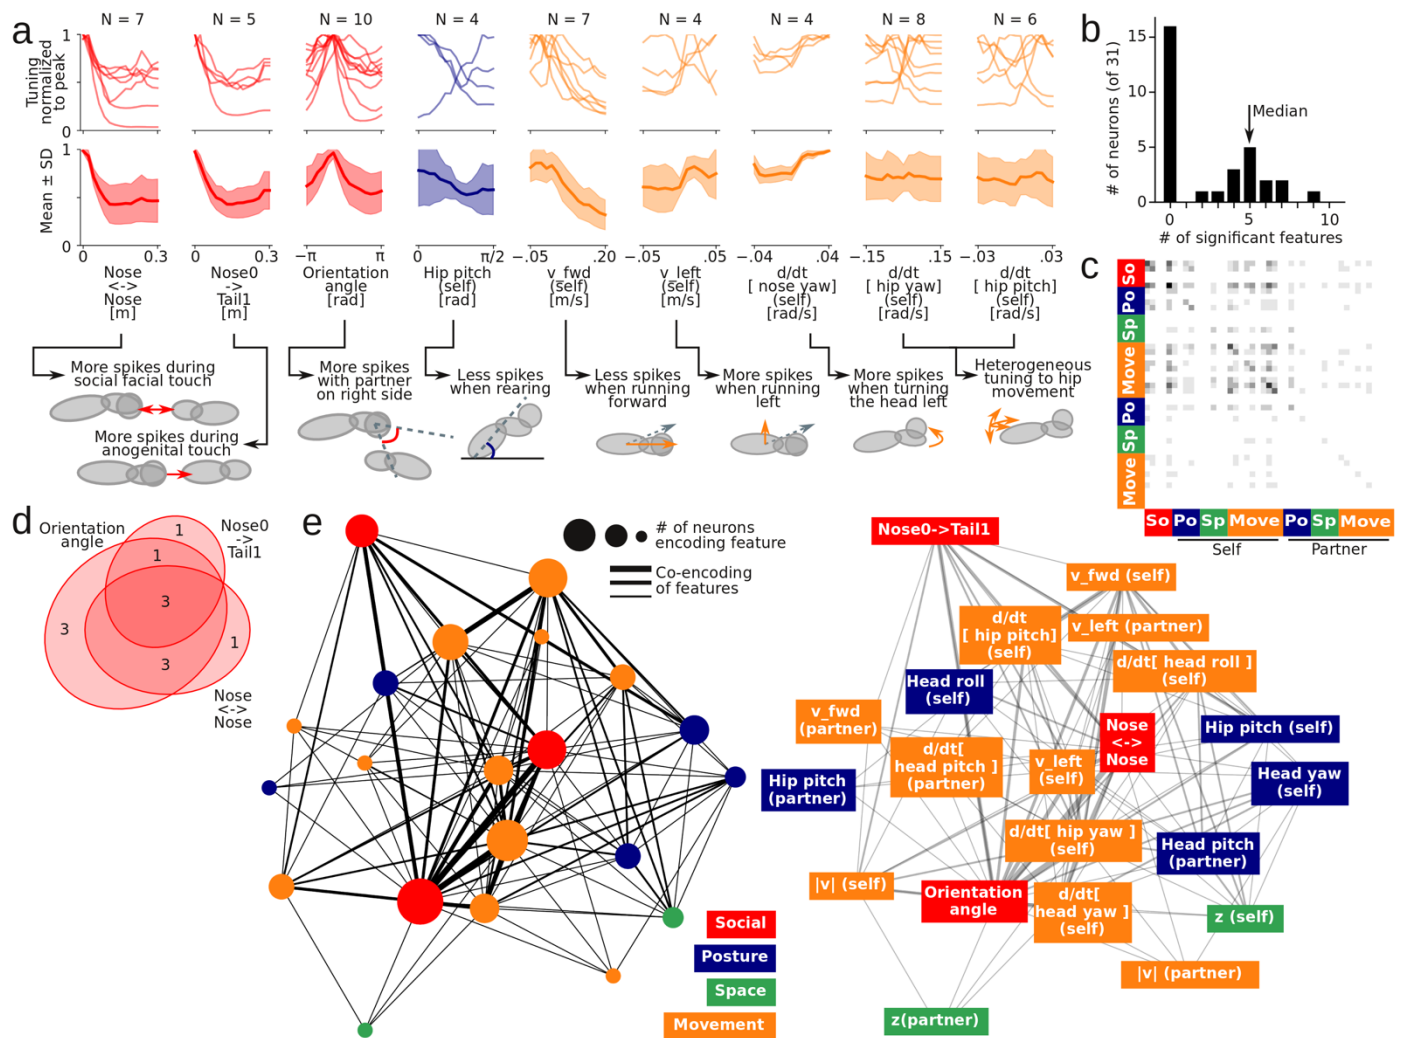

1005

1006 **Figure 8. Population tuning and co-encoding network structure in a social situation.** **a**, Top, single  
 1007 neuron tuning curves and 'population tuning curve' (average tuning, shaded area indicates standard devi-  
 1008 ation) for all behavioral features encoded by more than three single neurons. Bottom, schematic depiction  
 1009 of the physical interpretation of the population tuning, in relation to the 3D body models. **b**, Distribution  
 1010 of the number of behavioral features that each single neuron multiplexes. The arrow indicated the median  
 1011 number of features encoded by a neuron that encode at least one feature. **c**, Co-encoding matrix of the  
 1012 neural population: The grayscale color in  $i$ 'th and  $j$ 'th bin in the heatmap indicates the number neurons  
 1013 that encode both feature  $i$  and  $j$  (ordering and color on the axes as in Fig. 7). **d**, Euler diagram of a subset  
 1014 of the co-encoding matrix: This shows the number of neurons that encode nose-to-nose touch, implanted-  
 1015 nose-to-partner-tail touch and orientation angle (i.e. are lateralized). **e**, Network graph depiction of the full  
 1016 co-encoding matrix. The size of the nodes indicates the number of neurons that encode a feature, the width

1017 of the edges indicates the number of neurons that co-encode a behavioral feature. The network is shown  
1018 in the Kamada-Kawai projection<sup>86</sup> (the distance between nodes approximate their graph-theoretical dis-  
1019 tance), with additional text labels on the network on the right.

1020 **Methods**

1021

1022 **Hardware**

1023

1024 Necessary hardware:

1025

| Item                                                     | Recommendation                                             | Price (USD) | N | Total (USD) |
|----------------------------------------------------------|------------------------------------------------------------|-------------|---|-------------|
| Depth cameras                                            | <a href="#">Intel RealSense D435</a>                       | 179.00      | 4 | 716.00      |
| Camera stands                                            | <a href="#">Etubby 26" gooseneck webcam stand</a>          | 24.96       | 4 | 99.84       |
| PCIe card with 4 independent USB 3.0 controllers         | <a href="#">Startech 4-port superspeed</a>                 | 83.54       | 1 | 83.54       |
| Active, repeating USB 3.0 cables                         | <a href="#">UGREEN, USB 3.0 Active Repeater Cable</a>      | 18.89       | 4 | 75.56       |
| Arduino with USB cable                                   | <a href="#">Arduino Uno R3</a>                             | 13.98       | 1 | 13.98       |
| Pytorch-compatible GPU                                   | <a href="#">Any NVIDIA card with CUDA support</a>          | 500.00      | 1 | 500.00      |
| Behavioral arena (acrylic cylinder or elevated platform) | <a href="#">12"-diameter, 5/32" thick acrylic cylinder</a> | 71.20       | 1 | 71.20       |
| Depth camera GPIO pin connector (jumper)                 | <a href="#">JST ASSHSSH28K305</a>                          | 0.54        | 8 | 4.32        |
| Depth camera GPIO pin connector (jumper housing)         | <a href="#">JST SHR-09V-S</a>                              | 0.19        | 4 | 0.76        |
| Colored ping-pong balls (for calibration)                | <a href="#">Stiga 40 mm ITTF Regulation size</a>           | 6.64        | 1 | 6.64        |
| Total                                                    |                                                            |             |   | 1571.84     |

1026

1027 General lab electronics (tape, wire, soldering equipment, etc.) and:

1028

| Item                                                 | N |
|------------------------------------------------------|---|
| Infrared or red LEDs                                 | 4 |
| 0.1" pin headers or jumper wires                     | 2 |
| 20 kOhm resistors                                    | 4 |
| 22 nF capacitors                                     | 4 |
| 200 Ohm resistor (or same order of magnitude)        | 1 |
| Stick (for moving ping-pong ball during calibration) | 1 |

1029

1030

1031 **Software**



1032 Our system uses the following software: Linux (tested on Ubuntu 16.04 LTE, but should work on others,  
1033 <https://ubuntu.com/>), Intel Realsense SDK (<https://github.com/IntelRealSense/librealsense>), Python  
1034 (tested on Python 3.6, we recommend Anaconda, <https://www.anaconda.com/distribution/>). Required Py-  
1035 thon packages will be installed with PIP or conda (script in supplementary software). All required software  
1036 is free and open source.

1037

### 1038 *Animal welfare*

1039 All experimental procedures were performed according to animal welfare laws under the supervision of  
1040 local ethics committees. Animals were kept on a 12hr/12hr light cycle with ad libitum access to food and  
1041 water. Mice presented as partner animals were housed socially in same-sex cages, and post-surgery im-  
1042 planted animals were housed in single animal cages. Neural recordings electrodes were implanted on the  
1043 dorsal skull under isoflurane anesthesia, with a 3D-printed electrode drive and a hand-built mesh hous-  
1044 ing. All procedures were approved under NYU School of Medicine IACUC protocols.

1045

### 1046 *Computer hardware*

1047 All experiments and benchmarks were done on a desktop PC running Ubuntu 16.04 LTE on a 3.7 GHz  
1048 6-core CPU (Intel i7-8700K), with 32 GB 2400 MHz RAM, and an Nvidia GeForce RTX 2080Ti GPU.

1049

### 1050 *Recording data structure*

1051 The Python program is set to pull raw images at 640 x 480 (color) and 640 x 480 (depth), but only saves  
1052 320 x 210 (color) and 320 x 240 (depth). We do this to reduce noise (multi-pixel averaging), save disk  
1053 space and reduce processing time. Our software also works for saving images up to 848 x 480 (color) and  
1054 848 x 480 (depth) at 60 frames/s, in case the system is to be used for a bigger arena, or to detect smaller  
1055 body parts (e.g., eyes, paws). Images were transferred from the cameras with the python bindings for the  
1056 Intel Realsense SDK (<https://github.com/IntelRealSense/librealsense>), and saved as 8-bit, 3-channel PNG  
1057 files with opencv (for color images) or as 16-bit binary files (for depth images).



1058

### 1059 ***3D data structure***

1060 For efficient access and storage of the large datasets, we save all pre-processed data to hdf5 files. Because  
1061 the number of data points (point-cloud and key-points) per frame varies, we save every frame as a jagged  
1062 array. To this end, we pack all pre-processed data to a single array. If we detect  $N$  points in the point-cloud  
1063 and  $M$  key-points in the color images, we save a stack of the 3D coordinates of the points in the point-  
1064 cloud ( $N \times 3$ , raveled to  $3N$ ), the weights ( $N$ ), the 3D coordinates of the key-points ( $M \times 3$ , raveled to  $3M$ ),  
1065 their pseudo-posterior ( $M$ ), an index indicating key-point type ( $M$ ), and the number of key-points (1).  
1066 Functions to pack and unpack the pre-processed data from a single line ('pack\_to\_jagged' and 'un-  
1067 pack\_from\_jagged') are provided.

1068

### 1069 ***Temporal synchronization***

1070 LED blinks were generated with voltage pulses from an Arduino (on digital pin 12), controlled over USB  
1071 with a python interface for the Firmata protocol (<https://github.com/tino/pyFirmata>). To receive the Fir-  
1072 mata messages, the Arduino was flashed with the 'StandardFirmata' example, that comes with the standard  
1073 Arduino IDE. TTL pulses were 150 ms long and spaced by  $\sim U(150, 350)$  ms. We recorded the emitted  
1074 voltage pulses in both the infrared images (used to calculate the depth image) and on a TTL input on an  
1075 Open Ephys Acquisition System (<https://open-ephys.org/>). We detected LED blinks and TTL flips by  
1076 threshold crossing and roughly aligned the two signals by the first detected blink/flip. We first refined the  
1077 alignment by cross correlation in 10 ms steps, and then identified pairs of blinks/flips by detecting the  
1078 closest blink, subject to a cutoff ( $zscore < 2$ , compared to all blink-to-flip time differences) to remove  
1079 blinks missed by the camera (because an experimenter moved an arm in front of a camera to place a mouse  
1080 in the arena, for example). The final shift and drift was estimated by a robust regression (Theil-Sen esti-  
1081 mator) on the pairs of blinks/links.

1082

### 1083 ***Deep neural network***

1084 We used a stacked hourglass network<sup>34</sup> implemented in Pytorch<sup>44</sup> (<https://github.com/pytorch/pytorch>).

1085 The network architecture code is from the implementation in ‘PyTorch-Pose’

1086 (<https://github.com/bearpaw/pytorch-pose>). The full network architecture is shown in **Supplementary**

1087 **Figure 1**. The Image augmentation during training was done with the ‘imgaug’ library

1088 (<https://github.com/aleju/imgaug>). Our augmentation pipeline is shown in **Supplementary Figure 3**. The

1089 ‘fake laser dot pattern’ was generated using the ‘snowflakes’ generator in the imgaug routines for gener-

1090 ating weather effects, tuned to look – by eye – to a similar dot size and density to the real laser dot pattern.

1091 The network was trained by RMSProp ( $\alpha = 0.99$ ,  $\epsilon = 10^{-8}$ ) with an initial learning rate of 0.00025. During

1092 training, the learning rate was automatically reduced by a factor of 10 if the training loss decreased by less

1093 than 0.1% for five successive steps (using the built-in learning rate scheduler in Pytorch). After training,

1094 we used the final output map of the network for key-point detection, and used a maximum filter to detect

1095 key-point locations as local maxima in network output images with a posterior pseudo-probability of at

1096 least 0.5.

1097

### 1098 ***Image labeling and target maps***

1099 For training the network to recognize body parts, we need to generate labeled frames by manual annotation.

1100 For each frame, 1-5 body parts are labeled on the implanted animal and 1-4 body parts on the partner

1101 animal. This can be done with any annotation software; we used a modified version of the free ‘DeepPo-

1102 seKit-Annotator’<sup>8</sup> (<https://github.com/jgraving/DeepPoseKit-Annotator/>) included in the supplementary

1103 code. This software allows easy labeling of the necessary points, and pre-packages training data for use in

1104 our training pipeline. Body parts are indexed by i/p for implanted/partner animal (‘nose\_p’ is the nose of

1105 the partner animal, for example). Target maps were generated by adding a Gaussian function ( $\sigma = 3$  px for

1106 implant,  $\sigma = 1$  px for other body parts, scaled to peak value = 1) to an array of zeros (at 1/4th the resolution

1107 of the input color image) at the location of every labeled body key-point. 1D part affinity maps were

1108 created by connecting labeled key-points in an array of zeros with a 1 px wide line (clipped to max value

1109 = 1), and blurring the resulting image with a Gaussian filter ( $\sigma = 3$  px).

1110

### 1111 *Aligning depth and color data*

1112 The camera intrinsics (focal lengths,  $f$ , optical centers,  $p$ , depth scale,  $d_{scale}$ ) and extrinsics (rotation matrices,  $R$ , translation vectors,  $\bar{t}$ ) for both the color and depth sensors can be accessed over the SDK. Depth  
1113 and color images were aligned to each other using a pinhole camera model. For example, the  $z$  coordinate  
1114 of a single depth pixel with indices ( $i_c, i_d$ ) and 16-bit depth value,  $d_{ij}$ , is given by:

$$1115 \quad z_d = d_{ij} \cdot d_{scale}$$

1116 And the  $x$  and  $y$  coordinates are given by:

$$1117 \quad \begin{bmatrix} x_d \\ y_d \end{bmatrix} = \begin{bmatrix} (j_d - p_{x,d}) \cdot z_d / f_{x,d} \\ (i_d - p_{y,d}) \cdot z_d / f_{y,d} \end{bmatrix}$$

1118 Using the extrinsics between the depth and color sensors, we can move the coordinate to the reference  
1119 frame of the color sensor:

$$1120 \quad \begin{bmatrix} x \\ y \\ z \end{bmatrix}_c = R_{d \rightarrow c} \begin{bmatrix} x \\ y \\ z \end{bmatrix}_d + \bar{t}_{d \rightarrow c}$$

1121 Using the focal length and optical center, we can project the pixel onto the color image:

$$1122 \quad \begin{bmatrix} i_c \\ j_c \end{bmatrix} = \begin{bmatrix} f_{y,c} \cdot y_c / z_c + p_{y,c} \\ f_{x,c} \cdot x_c / z_c + p_{x,c} \end{bmatrix}$$

1123 For assigning color pixel values to depth pixels, we simply rounded the color pixel indices ( $i_c, i_d$ ) to the  
1124 nearest integer and cloned the value. More computationally intensive methods based on ray-tracking exist  
1125 ('rs2\_project\_color\_pixel\_to\_depth\_pixel' in the Librealsense SDK, for example), but the simple pinhole  
1126 camera approximation yielded good results (small jitter average out across multiple key-points) which  
1127 allowed us to skip the substantial computational overhead of ray tracing for our data pre-processing.

1128

### 1129 *Depth camera calibration, exposure and 3D alignment*

1130 To align the cameras in space, we first mounted a blue ping-pong ball on a stick and moved it around the  
1131 behavioral arena while recording both color and depth video. For each camera, we used a combination of  
1132 motion filtering, color filtering, smoothing and thresholding to detect the location of the ping-pong ball in  
1133

1134 the color frame (details in code). We then aligned the color frames to depth frames and extracted the  
1135 corresponding depth pixels, yielding a partial 3D surface of the ping-pong ball. By fitting a sphere to this  
1136 partial surface, we could estimate the 3D coordinate of the center of the ping-pong ball (**Fig. 3a**). This  
1137 procedure yielded a 3D trajectory of the ping-pong ball in the reference frame of each camera (**Fig. 3b**).  
1138 We used a robust regression method (RANSAC routines to fit a sphere with a fixed radius of 40 mm,  
1139 modified from routines in <https://github.com/daavoo/pyntcloud>), insensitive to errors in the calibration  
1140 ball trajectory to estimate the transformation matrices needed to bring all trajectories into the same frame  
1141 of reference (**Fig. 3c**). The software includes a step-by-step recipe for performing the alignment procedure.  
1142 The depth cameras have a minimum working distance of 20 cm, so they must be placed at least this dis-  
1143 tance from the behavioral arena. The depth map is calculated from the infrared camera stream, so – as  
1144 with the RGB video – it is important that the image is not under- or over-exposed. The code includes a  
1145 tool for streaming live video from all cameras to verify that: (i) the whole arena is in view of all the  
1146 cameras and (ii) that the exposure is reasonable. The exposure settings can be changes in the config files,  
1147 that are loaded and applied when recording (the Intel RealSense SDK demo C application library also  
1148 includes a nice tool for testing different exposure settings). The 3D pixel density drops off with distance  
1149 from the camera (following the inverse-square law). In our tested use (standard neuroscience behavioral  
1150 arena, max.  $\sim 1 \times 1$  m), the exact relative placement of the four depth cameras does not matter (as they are  
1151 aligned by the calibration). However, for very large arenas, it may be necessary to add more depth cameras  
1152 (additional cameras mounted above the arena, for example). Adding more cameras will only affect the  
1153 pre-processing time (can be run in parallel – which can minimize the impact of more cameras), not the  
1154 actual body model fitting time (the slowest part of the algorithm). The body model fitting time is deter-  
1155 mined by the number of mice tracked (the particle filter sorting step scales exponentially with the number  
1156 of mice, because the algorithm evaluates multi-animal poses).

1157

1158 **Body model**

1159 We model each mouse at two prolate ellipsoids. The model is specified by the 3D coordinate of the center  
1160 of the hip ellipsoid,  $\bar{c}_{hip} = [x, y, z]$ , and the major and minor axis of the ellipsoids are scaled by a coordi-  
1161 nate,  $s \in [0,1]$  that can morph the ellipsoid from long and narrow to short and fat:

$$1162 \quad a_{hip} = a_{hip,0} + a_{hip,\Delta} \cdot s$$

$$1163 \quad b_{hip} = b_{hip,0} + b_{hip,\Delta} \cdot (1 - s)$$

1164 The ‘neck’ (the joint of rotation between the hip and nose ellipsoid) is sitting a distance,  $d_{hip} = 0.75 \cdot$   
1165  $a_{hip}$ , along the central axis of the hip ellipsoid. In the frame of reference of the mouse body (taking  $\bar{c}_{hip}$   
1166 as the origin, with the major axis of the hip ellipsoid along the  $x$ -axis), a unit vector pointing to of the nose  
1167 ellipsoid, from the ‘neck’ to the center of the nose ellipsoid along the major axis is:

$$1168 \quad \bar{e}_{nose} = \begin{bmatrix} \cos \theta \\ \sin \theta \cos \phi \\ \sin \theta \sin \phi \end{bmatrix}$$

1169 In the frame of reference of the laboratory (‘world coordinates’), we allow the hip ellipsoid to rotate around  
1170 the  $z$ -axis (‘left’/‘right’) and around the  $y$ -axis (‘up’/‘down’, in the frame of reference of the mouse). We  
1171 define  $\mathbf{R}(\alpha_x, \alpha_y, \alpha_z)$  as a 3D rotation matrix specifying the rotation by an angle  $\alpha$  around the three axes,  
1172 and  $\mathbf{R}(\bar{v}_1, \bar{v}_2)$  as a 3D rotation matrix that rotates the vector  $\bar{v}_1$  onto  $\bar{v}_2$ . The we can define:

$$1173 \quad \mathbf{R}_{hip} = \mathbf{R}(0, \beta, \gamma)$$

$$1174 \quad \mathbf{R}_{head} = \mathbf{R}(\bar{e}_x, \bar{e}_{nose})$$

1175 , where  $\bar{e}_x$  is a unit vector along the  $x$ -axis. In the frame of reference of the mouse body, the center of the  
1176 nose ellipsoid is:

$$1177 \quad \bar{c}_{nose,mouse} = \mathbf{R}_{head} \begin{bmatrix} d_{nose} \\ 0 \\ 0 \end{bmatrix} + \begin{bmatrix} d_{hip} \\ 0 \\ 0 \end{bmatrix}$$

1178 So, in world coordinates, the center is:

$$1179 \quad \bar{c}_{nose,world} = \mathbf{R}_{hip} \bar{c}_{nose,mouse} + \bar{c}_{hip}$$

1180 The center of the neural implant is offset from the center of the nose ellipsoid by a distance  $x_{impl}$  along  
 1181 the major axis of the nose ellipsoid, and a distance  $z_{impl}$  orthogonal to the major axis. We allow the im-  
 1182 plant to rotate around the nose ellipsoid by an angle,  $\psi$ . Thus, in the frame of reference of the mouse body,  
 1183 the center of the ellipsoid is:

$$1184 \quad \bar{c}_{impl,mouse} = \mathbf{R}_{head} \begin{bmatrix} s_{impl} \\ d_{impl} \cdot \cos \psi \\ d_{impl} \cdot \sin \psi \end{bmatrix} + \begin{bmatrix} d_{hip} \\ 0 \\ 0 \end{bmatrix}$$

1185 And in world coordinates, same as the center of the nose ellipsoid:

$$1186 \quad \bar{c}_{impl,world} = R_{hip} c_{impl,mouse} + \bar{c}_{hip}$$

1187 We calculated other skeleton points (tip of the nose ellipsoid, etc.) in a similar method. We can use the  
 1188 rotation matrices for the hip and the nose ellipsoids to calculate the characteristic ellipsoid matrices:

$$1189 \quad \mathbf{Q}_{hip} = \mathbf{R}_{hip} \begin{bmatrix} 1/a_{hip}^2 & 0 & 0 \\ 0 & 1/b_{hip}^2 & 0 \\ 0 & 0 & 1/b_{hip}^2 \end{bmatrix} (\mathbf{R}_{hip})^T$$

$$1190 \quad \mathbf{Q}_{nose} = \mathbf{R}_{hip} \mathbf{R}_{head} \begin{bmatrix} 1/a_{nose}^2 & 0 & 0 \\ 0 & 1/b_{nose}^2 & 0 \\ 0 & 0 & 1/b_{nose}^2 \end{bmatrix} (\mathbf{R}_{hip} \mathbf{R}_{head})^T$$

1191 Calculating the shortest distance from a point to the surface of an 3D ellipsoid in 3 dimensions requires  
 1192 solving a computationally-expensive polynomial<sup>39</sup>. Doing this for each of the thousands of points in the  
 1193 point-cloud, multiplied by four body ellipsoids, multiplied by 200 particles pr. fitting step is not compu-  
 1194 tationally tractable. Instead, we use the shortest distance to the surface,  $\tilde{d}$ , along a path that passes through  
 1195 the centroid (**Supplementary Fig. 8a,b**). This is a good approximation to  $d$  (especially when averaged  
 1196 over many points), and the calculation of  $\tilde{d}$  can be implemented as pure vectorized linear algebra, which  
 1197 can be calculated very efficiently on GPU<sup>40</sup>. Specifically, to calculate the distance from any point  $\bar{p}$  in the  
 1198 point-cloud, we just center the points on the center of an ellipsoid, and – for example – calculate:

$$1199 \quad \bar{p}' = \bar{p} - \bar{c}_{hip}$$

$$1200 \quad \tilde{d} = \left| 1 - \|\bar{p}'\|_{Q_{hip}}^{-1} \right| \cdot \|\bar{p}'\| \quad \text{where} \quad \|\bar{p}'\|_{Q_{hip}} = \sqrt{\langle \bar{p}', \bar{p}' \rangle_{Q_{hip}}} = \sqrt{(\bar{p}')^T Q_{hip} \bar{p}'}$$

1201 In fitting the model, we used the following constants:  $a_{nose} = 2.00$  cm,  $b_{nose} = 1.20$  cm,  $a_{hip(min)} =$   
1202  $0.50$  cm,  $a_{hip(max)} = 2.50$  cm,  $b_{hip(min)} = 1.20$  cm,  $b_{hip(max)} = 1.50$  cm,  $d_{nose} = 1.00$  cm,  $d_{hip} =$   
1203  $0.75 \cdot a_{hip}$ ,  $r_{impl} = 0.9 \cdot b_{nose}$ ,  $x_{impl} = d_{nose} + 0.5 \cdot a_{nose}$ ,  $z_{impl} = 1.5 \cdot r_{impl}$ . The code includes a pa-  
1204 rameter ('body\_scale') that can be changed to scale the mouse body model (e.g. for other strains, or juve-  
1205 nile mice).

1206

### 1207 ***Loss function evaluation and tracking***

1208 Joint position of the two mice is represented as a particle in 17-dimensional space. For each data frame,  
1209 we start with a proposal particle (leftmost green block, based on previous frames), from which we generate  
1210 200 particles by pseudo-random perturbation within a search space (next green block). For each proposal  
1211 particle, we calculate three types of weighted loss contributions: loss associated with the distance from  
1212 the point-cloud to the surface of the mouse body models (top path, green color), loss associated with body  
1213 key-points (middle path, key-point colors as in and loss associated with overlap of the two mouse body  
1214 models (bottom path, purple color). We broadcast the results in a way, which allows us to consider all  
1215  $200 \times 200 = 40.000$  possible joint postures of the two mice. After calculation, we pick the top 200 joint  
1216 postures with the lowest overall loss, and anneal the search space, or – if converged – continue to the next  
1217 frame. When we continue to a new frame, we add the fitted frame to an online recursive filter bank, which  
1218 proposes the next position of the particle for the next frame, based on previous frame. All loss function  
1219 calculations, and recursive filter predictions are implemented as pure tensor algebra, fully vectorized and  
1220 executed on a GPU.

1221

### 1222 ***Online recursive filtering***

1223 To propose a new location for the particle filter between frames, we use a recursive least squares filter<sup>89</sup>,  
1224 with a time embedding of 5 steps, a forgetting factor of  $\mu = 0.99$  and a regularization factor of  $\varepsilon = 0.1$ .  
1225 Our implementation ('rls\_bank') is based on the implementation in the Padasip (Python Adaptive Signal  
1226 Processing) library (<https://github.com/matousc89/padasip>). For the first 150 frames, the filter is only



1227 trained, but after frame 150, the filter is used for prediction. The code allows this filter to run across all  
1228 dimensions of the particle filter, but – in practical use – we found it sufficient to run it across the x-, y-  
1229 and z- coordinates of the center of the two mouse body models (i.e., we just assume that the angular and  
1230 stretch coordinates do not change from the last frame – this saves a few computations, and can be selected  
1231 by commenting in/out the relevant lines in the code).

1232

### 1233 **Regularizations**

1234 To regularize the particle filter algorithm, we imposed two hard rules (‘barriers’) on the movement of the  
1235 body models (shown in **Supplementary Figure 8**). The first barrier was implemented by adding a large  
1236 term to the particle filter’s loss function, if the center of any ellipsoids from two different bodies were  
1237 closer than 0.8 times the sum of their short axes (this barrier allows a 20% overlap of spheres with a radius  
1238 equal to the ellipsoid’s small axis, drawn in purple in **Supplementary Fig. 8f**). This barrier term prevents  
1239 ‘unphysical’ overlaps between the body models of the two mice. The second barrier was implemented by  
1240 adding a large term to the particle filter’s loss function, if the same condition was met between the current  
1241 position of a mouse body model and the interaction partners body model *in the preceding frame* (**Supple-**  
1242 **mentary Fig. 8h**). This barrier term prevents ‘flips’ between the two mice (where the body models change  
1243 identity), as drawn in in **Supplementary Figure 8g**.

1244

### 1245 **State space filtering of raw tracking data**

1246 After tracking, the coordinates of the skeleton points ( $c_{hip}$ ,  $c_{nose}$ , etc.) were smoothed with a 3D kinematic  
1247 Kalman filter tracking both the 3D position ( $p$ ), velocity ( $v$ ) and (constant) acceleration ( $a$ ). For example,  
1248 for the center of the hip coordinate:

$$1249 \quad \bar{x} = [p_x, v_x, a_x, p_y, v_y, a_y, p_z, v_z, a_z]$$

$$1250 \quad \bar{z} = [c_{hip,x}, c_{hip,y}, c_{hip,z}]$$

$$1251 \quad \mathbf{F} = \begin{bmatrix} \mathbf{F}' & \mathbf{0} & \mathbf{0} \\ \mathbf{0} & \mathbf{F}' & \mathbf{0} \\ \mathbf{0} & \mathbf{0} & \mathbf{F}' \end{bmatrix}, \text{ where } \mathbf{F}' = \begin{bmatrix} 1 & dt & \frac{1}{2} dt^2 \\ 0 & 1 & dt \\ 0 & 0 & 1 \end{bmatrix}$$

1252 
$$\mathbf{H} = \begin{bmatrix} 1 & 0 & 0 & 0 & 0 & 0 & 0 & 0 & 0 \\ 0 & 0 & 0 & 1 & 0 & 0 & 0 & 0 & 0 \\ 0 & 0 & 0 & 0 & 0 & 0 & 1 & 0 & 0 \end{bmatrix}$$

1253 
$$\mathbf{P} = \mathbf{1}_{9 \times 9} \cdot \sigma_{cov}^2$$

1254 
$$\mathbf{R} = \mathbf{I}_{3 \times 3} \cdot \sigma_{measurement}^2$$

1255 
$$\mathbf{Q} = \begin{bmatrix} \mathbf{Q}' & \mathbf{0} & \mathbf{0} \\ \mathbf{0} & \mathbf{Q}' & \mathbf{0} \\ \mathbf{0} & \mathbf{0} & \mathbf{Q}' \end{bmatrix} \cdot \sigma_{process}^2$$

1256 where  $\mathbf{Q}'$  is the Q matrix for a discrete constant white noise model  $\mathbf{Q}' = \begin{bmatrix} \frac{1}{4} dt^4 & \frac{1}{2} dt^3 & \frac{1}{2} dt^2 \\ \frac{1}{2} dt^3 & dt^2 & dt \\ \frac{1}{2} dt^2 & dt & 1 \end{bmatrix}$  and

1257  $\sigma_{measurement} = 0.015$  m,  $\sigma_{process} = 0.01$  m,  $\sigma_{cov}^2 = 0.0011$  m<sup>2</sup>. The  $\sigma$ 's were the same for all points,

1258 except the slightly more noisy estimate of the center of the implant, where we used.  $\sigma_{measurement} =$

1259  $0.02$  m,  $\sigma_{process} = 0.01$  m,  $\sigma_{cov}^2 = 0.0011$  m<sup>2</sup> From the frame rate (60 fps),  $dt = \frac{1}{60}$  s. The maximum-

1260 likelihood trajectory was estimated with the Rauch-Tung-Striebel method<sup>48</sup> with a fixed lag of 16 frames.

1261 The filter and smoother was implemented using the 'filterpy' package (<https://github.com/rlabbe/filterpy>).

1262 The spine scaling,  $s$ , was smoothed with a similar filter in 1D, except that we did not model acceleration,

1263 only  $s$  and a (constant)  $s$  'velocity', with  $\sigma_{measurement} = 0.3$ ,  $\sigma_{process} = 0.05$  m,  $\sigma_{cov}^2 = 0.0011$ .

1264 After filtering the trajectories of the skeleton points, we recalculated the 3D rotation matrices of the hip

1265 and head ellipsoid by the vectors pointing from  $c_{hip}$  to  $c_{mid}$  (from the middle of the hip ellipsoid to the

1266 neck joint), and from  $c_{hip}$  to  $c_{nose}$  (from the neck joint to the middle of the nose ellipsoid). We then con-

1267 verted the 3D rotation matrixes to unit quaternions, and smoothed the 3D rotations by smoothing the

1268 quaternions with an 10-frame boxcar filter, essentially averaging the quaternions by finding the largest

1269 eigenvalue of a matrix composed of the quaternions within the boxcar<sup>50</sup>. After smoothing the ellipsoid

1270 rotations, we re-calculated the coordinates of the tip of the nose ellipsoid ( $c_{tip}$ ) and the posterior end of

1271 the hip ellipsoid ( $c_{tail}$ ) from the smoothed central coordinates, rotations, and – for  $c_{tail}$  – the smoothed

1272 spine scaling. A walkthrough of the state space filtering pipeline is shown in **Supplementary Figure 12**.

1273

1274 **Template matching**

1275 To detect social events, we calculated three social distances, from three instantaneous ‘social distances’,  
1276 defined as the 3D distance between the tip of each animal’s noses (‘nose-to-nose’), and from the tip of  
1277 each animal’s nose to the posterior end of the conspecific’s hip ellipsoid (‘nose-to-tail’; **Fig. 5c**). From  
1278 these social distances, we could automatically detect when the mouse bodies were in a nose-to-nose (if  
1279 the nose-to-nose distance was  $< 2$  cm and the nose-to-tail distance was  $> 6$  cm) and in a nose-to-tail  
1280 configuration (if the nose-to-nose distance was  $> 6$  cm and the nose-to-tail distance was  $> 2$  cm). The  
1281 events were detected by the logic conditions, and then single threshold crossings due to noise were re-  
1282 moved by binary opening with a 3-frame kernel, followed by binary closing with a 30-frame kernel.

1283

1284 **State space modeling of mouse behavior**

1285 State space modeling of the locomotion behavior was performed in Pyro<sup>56</sup> a GPU-accelerated probabilistic  
1286 programming language built on top of Pytorch<sup>44</sup>. We modeled the (centered and whitened) locomotion  
1287 behavior as a hidden Markov model with discrete latent states,  $z$ , and associated transition matrix,  $\mathbf{T}$ .

1288 
$$z(t + 1) = \text{Categorical}(e_{z(t)}^T \cdot \mathbf{T})$$

1289 
$$\mathbf{T} = \begin{bmatrix} p_{ij} & \cdots \\ \vdots & \ddots \end{bmatrix}$$

1290 To make the model ‘sticky’ (discourage fast switching between latent states) we draw the transition prob-  
1291 abilities,  $p_{ij}$  from a Dirichlet prior with a high mass near the ‘edges’ and initialize  $\mathbf{T}_{init} = (1 - \eta)\mathbf{I} +$   
1292  $\eta/n_{states}$  where  $\eta = 0.05$ .

1293 
$$p \sim \text{Diriclet}(0.5)$$

1294 Each state emits a forward speed and a left speed, drawn from a two-dimensional Gaussian distribution  
1295 with a full covariance matrix.

1296 
$$\begin{bmatrix} v_{\text{fwd}} \\ v_{\text{left}} \end{bmatrix} \sim \text{MVNormal}(\mu, \mathbf{S})$$

1297 We draw the mean of the states from a normal distribution and use a LKJ Cholesky prior for the covariance:

1298 
$$\mu \sim \text{Normal}(0,1)$$

1299 
$$\mathbf{S} = \begin{bmatrix} \sigma_{\text{fwd}} & 0 \\ 0 & \sigma_{\text{left}} \end{bmatrix} \mathbf{L} \begin{bmatrix} \sigma_{\text{fwd}} & 0 \\ 0 & \sigma_{\text{left}} \end{bmatrix}$$

1300 
$$\sigma \sim \text{LogNormal}(-1, 1)$$

1301 
$$\mathbf{L} \sim \text{LKJcorr}(2)$$

1302 The up speed was modeled in a similar way, except that the latent states were just a one-dimensional  
1303 normal distribution. The means and variances for the latent states was initialized by kmeans clustering of  
1304 the locomotion speeds. The model was fit in parallel to 600-frame snippets of a subset of the data by  
1305 stochastic variational inference<sup>90</sup>. We used an automatic delta guide function (‘AutoDelta’) and an evi-  
1306 dence lower bound (ELBO) loss function. The model was fitted by stochastic gradient descent with a  
1307 learning rate of 0.0005. After model fitting, we generated the ethograms by assigning latent states by  
1308 maximum a posteriori probability with a Viterbi algorithm.

1309

### 1310 *3D head direction estimation*

1311 We use the 3D position of the ear key-points to determine the 3d head direction of the partner animal. We  
1312 assign the ear key-points to a mouse body model by calculating the distance from each key-point to the  
1313 center of the nose ellipsoid of both animals (cutoff: closest to one mouse and < 3cm from the center of the  
1314 head ellipsoid, **Supplementary Fig 17a**). To estimate the 3D head direction, we calculate the unit rejection  
1315 ( $v_{rej}$ ) between a unit vector along the nose ellipsoid ( $v_{nose}$ ) and a unit vector from the neck joint ( $c_{mid}$ )  
1316 to the average 3D position of the ear key-points that are associated with that mouse ( $v_{ear\_direction}$ ,  
1317 **Supplementary Fig. 17b**). If no ear key-points were detected in a frame, we linearly interpolate the aver-  
1318 age 3D position. To average out jitter, the estimates of the average ear coordinates and the center of the  
1319 nose coordinate were smoothed with a Gaussian ( $\sigma = 3$  frames). The final head direction vector was also  
1320 smoothed with a Gaussian ( $\sigma = 10$  frames).

1321

### 1322 *Extracellular recording and spike clustering*

1323 Extracellular recordings were made with sharpened 2-shank, 32-site NeuroNexus P2 profile silicon probes  
1324 (NeuroNexus Technologies, Inc., MI, USA). The silicon probes were implanted in barrel cortex using a

1325 stereotax (1 mm posterior, 3.2 mm lateral to bregma<sup>91</sup>) under isoflurane anesthesia using a custom 3D  
1326 printed plastic microdrive and base plates for mice, shielded by a copper mesh and bound to the animal's  
1327 skull using dental cement<sup>92</sup>. The neural data was recorded using an Intan RHD 32-channel headstage with  
1328 accelerometer (Intan Technologies, CA, USA) connected to an Open Ephys Acquisition Board<sup>93</sup>  
1329 (<https://open-ephys.org/>) at 30 kHz/16 bit resolution. The neural data was pre-clustered using SpyKING  
1330 CIRCUS<sup>94</sup> (a custom probe geometry file for the P2 probe and the full clustering script with all parameters  
1331 is available in the supplementary code) and checked manually for cluster quality in KLUSTA<sup>95</sup>. Only well-  
1332 separated single units were included in the analysis.

1333

### 1334 ***PSTH-based analysis of neural responses***

1335 For the PSTH-based analysis, we triggered on the three social events detected as described under ‘Tem-  
1336 plate matching’. For the ‘naïve’ PSTH, we included all events, and for the ‘cleaned’ PSTH, we only in-  
1337 cluded events, where there was no other of the detected events occurring in the preceding 4 seconds.  
1338 Significant firing rate changes were detected by comparing the average firing rate,  $r_{pre}$ , between -4 s and  
1339 -2 s (relative to the start of the detected event) with the average firing rate,  $r_{post}$ , between -0.5 s and 0.5  
1340 s, using a Wilcoxon signed rank test, at  $p < 0.05$ . The firing rate modulation index was calculated using  
1341 the same firing rates and defined as:

$$1342 \quad \text{Mod. idx.} = \frac{r_{post} - r_{pre}}{r_{post} + r_{pre}}$$

1343

### 1344 ***Statistical modeling of neural tuning curves***

1345 Our spike train modeling approach is based on ref. <sup>62</sup> and our python code for model fitting and model  
1346 selection is based on the supplementary Matlab code from that study (available at  
1347 <https://github.com/GiocomoLab/ln-model-of-mec-neurons>). We calculated the following features of the  
1348 ‘social scene’ (shown in the table below). In the table, we only list the variables associated with the pos-  
1349 ture, spatial location and movement of the implanted animal (subscript 0). We include identical features

1350 for the partner animal (subscript 1). The bin ranges were selected to span the physically possible values  
 1351 (e.g., within the circular arena), or to span the observed values in the behavior (for movement speeds, for  
 1352 example).

1353

1354

| Class  | Feature           | Variable name in code | Definition                                                                                                                                                                                                                               | Binning                                 | Unit    | Tuning curve type |
|--------|-------------------|-----------------------|------------------------------------------------------------------------------------------------------------------------------------------------------------------------------------------------------------------------------------------|-----------------------------------------|---------|-------------------|
| Social | Nose <-> Nose     | d_n2n                 | Nose-to-nose distance                                                                                                                                                                                                                    | [0.01 ,0.29], $\Delta\text{bin} = 0.02$ | m       | Linear            |
|        | Nose0 -> Tail1    | d_n0t1                | Distance from the nose of the implanted animal to the tail base of the partner animal                                                                                                                                                    | [0.01 ,0.29], $\Delta\text{bin} = 0.02$ | m       | Linear            |
|        | Nose1 -> Tail0    | d_n1t0                | Distance from the nose of the partner animal to the tail base of the Implanted animal                                                                                                                                                    | [0.01 ,0.29], $\Delta\text{bin} = 0.02$ | m       | Linear            |
|        | d/dt[ d_social ]  | diffd_social          | Temporal derivative in the distance between the center (c_mid) of the two mice, convolved with a Gaussian ( $\sigma = 10$ frames).                                                                                                       | [-0.002,0.002], 15 bins                 | m/frame | Linear            |
|        | Orientation angle | a_gaze_mid            | Relative orientation of the mice (with the implanted animal as the reference), defined as the angle between a vector along the nose ellipsoid of the implanted animal, and a vector along the body ellipsoid of the partner animal (both | $[-\pi, \pi - (\pi/15)]$ , 15 bins      | rad     | Circular          |

|         |               |                   |                                                                                                                                                                                                                         |                               |      |        |
|---------|---------------|-------------------|-------------------------------------------------------------------------------------------------------------------------------------------------------------------------------------------------------------------------|-------------------------------|------|--------|
|         |               |                   | vectors projected into the xy-plane).                                                                                                                                                                                   |                               |      |        |
| Posture | Head yaw      | a_nose_lr_0       | Angle between a vector along the nose ellipsoid and a vector along the hip ellipsoid, in the xy-plane)                                                                                                                  | $[-\pi/3, \pi/3]$ , 15 bins   | rad  | Linear |
|         | Head pitch    | a_nose_ud_0       | The elevation angle of the nose ellipsoid, relative to the hip ellipsoid (The elevation angle between a vector along the nose ellipsoid and the xy-plane, minus the elevation angle of the hip ellipsoid).              | $[-0.9, 0.9]$ , 15 bins       | rad  | Linear |
|         | Head roll     | head_roll_0       | Angle between a vector from the center of the nose ellipsoid to the ‘top’ of the head (the center of the implant for the implanted animal, the center of the ears in the partner animal) and a vector along the z-axis. | $[-2\pi/3, 2\pi/3]$ , 15 bins | rad  | Linear |
|         | Hip pitch     | a_hip_elevation_0 | The elevation angle between a vector along the hip ellipsoid and the xy-plane.                                                                                                                                          | $[0, \pi/2]$ , 15 bins        | rad  | Linear |
|         | Spine stretch | s0                | Stretch parameter of the hip ellipsoid in the body model                                                                                                                                                                | $[0.5, 1.0]$ , 15 bins        | a.u. | Linear |
| Spatial | x             | x_hip_0           | x-component of the center of the hip ellipsoid (c_hip)                                                                                                                                                                  | $[-0.13, 0.13]$ , 15 bins     | m    | Linear |



|           |                    |                       |                                                                                     |                                             |           |          |
|-----------|--------------------|-----------------------|-------------------------------------------------------------------------------------|---------------------------------------------|-----------|----------|
|           | y                  | y_hip_0               | y-component of the center of the hip ellipsoid (c_hip)                              | $[-0.13, 0.13]$ , 15 bins                   | m         | Linear   |
|           | z                  | z_hip_0               | z-component of the center of the hip ellipsoid (c_hip)                              | $[0.02, 0.05]$ , 15 bins                    | m         | Linear   |
|           | Distance to center | d_arena_0             | Distance from the center of the hip ellipsoid to the center of the behavioral arena | $[0., 0.14]$ , 15 bins                      | m         | Linear   |
|           | Head direction     | a_nose_hd_0           | Angle of the nose ellipsoid in the xy-plane                                         | $[-\pi, \pi - (\pi/15)]$ , 15 bins          | rad       | Circular |
| Move-ment | v_fwd              | fwd_0                 | Forward component (along the hip ellipsoid) of the speed vector, in the xy-plane    | $[-0.05, 0.2]$ , 15 bins                    | m/s       | Linear   |
|           | v_left             | left_0                | Orthogonal component of the speed vector, in the xy-plane                           | $[-0.05, 0.05]$ , 11 bins                   | m/s       | Linear   |
|           | v_up               | up_0                  | z-component of the speed vector                                                     | $[-0.04, 0.05]$ , $\Delta\text{bin} = 0.01$ | m/s       | Linear   |
|           | v                  | speed3D_0             | Norm of the speed vector                                                            | $[0.01, 0.20]$ , 15 bins                    | m/s       | Linear   |
|           | d/dt[ head yaw ]   | diffa_nose_lr_0       | Derivative of the head yaw, convolved with a Gaussian ( $\sigma = 10$ frames).      | $[-0.04, 0.04]$ , 15 bins                   | rad/frame | Linear   |
|           | d/dt[ head pitch ] | diffa_nose_ud_0       | Derivative of the head pitch, convolved with a Gaussian ( $\sigma = 10$ frames).    | $[-0.04, 0.04]$ , 15 bins                   | rad/frame | Linear   |
|           | d/dt[ head roll ]  | diffhead_roll_0       | Derivative of the head roll, convolved with a Gaussian ( $\sigma = 10$ frames).     | $[-0.04, 0.04]$ , 15 bins                   | rad/frame | Linear   |
|           | d/dt[ hip yaw ]    | diffa_hip_hd_0        | Derivative of the hip yaw, convolved with a Gaussian ( $\sigma = 10$ frames).       | $[-0.15, 0.15]$ , 15 bins                   | rad/frame | Linear   |
|           | d/dt[ hip pitch ]  | diffa_hip_elevation_0 | Derivative of the hip pitch,                                                        | $[-0.3, 0.3]$ , 15 bins                     | rad/frame | Linear   |

|  |                       |        |                                                                                     |                     |         |        |
|--|-----------------------|--------|-------------------------------------------------------------------------------------|---------------------|---------|--------|
|  |                       |        | convolved with a Gaussian ( $\sigma = 10$ frames).                                  |                     |         |        |
|  | d/dt[ spine stretch ] | diffs0 | Derivative of the spine stretch, convolved with a Gaussian ( $\sigma = 10$ frames). | [-0.1,0.1], 15 bins | 1/frame | Linear |

1355

1356 We model the observed spike train as generated by the following process (**Fig. 7c**): The spikes are gener-  
 1357 ated by a Poisson process. The rate of the Poisson process is determined by the features, in the following  
 1358 way: Each feature is multiplied with a tuning curve (taking any real value), to generate a weight. The  
 1359 weights of all features are summed, pass through an exponential nonlinearity (to clamp the rate of the  
 1360 Poisson process to be positive). This means that in the spike rate space, the tuning to the features is mul-  
 1361 tiplicative.

1362

1363 We convert each feature into binary dummy variables by binning (bins listed in the table above) to generate  
 1364 a time-by-bins matrix,  $A$ , where the  $i$ 'th and  $j$ 'th index is a binary variable indicating if the feature was in  
 1365 the  $j$ 'th feature bin in the  $i$ 'th frame. If we let  $\bar{c}$  be a column vector with the values of the tuning curve for  
 1366 a single predictor, then our linear model says that the rate of the Poisson process generating the spikes,  $\lambda$ ,  
 1367 depending on  $p$  predictors can be expressed as

1368

$$\bar{\lambda} = \exp\left(\sum_p A_p \bar{c}_p\right) / dt$$

1369 We fit the linear model by tuning the parameters of the tuning curves to maximize of the Poisson log-  
 1370 likelihood of the observed number of spikes,  $n$ , in each bin of the spike train. We include a regularization  
 1371 term,  $\beta$ , that ensures that the tuning curves are smooth (it is a loss term associated with the difference  
 1372 between  $c_i$  and  $c_{i+1}$ , with circular wrap-around for the circular features). Thus, the fitted tuning curves  
 1373 are:

1374

$$\hat{c} = \operatorname{argmax}_c \sum_i \log P\left(n_i \mid \exp\left(\sum_p A_p \bar{c}_p\right)\right) - \sum_p \beta \left(\sum_i \frac{1}{2} (c_{p,i} - c_{p,i+1})^2\right)$$

1375

1376 We fit the models using the Newton conjugate gradient trust-region algorithm ('trust-ncg' method in 'min-  
1377 imize' in the SciPy optimize module, using the Taylor expansion approximation to the Jacobian and Hes-  
1378 sian and a tolerance of 1e-3).

1379

1380 To determine which features significantly contribute to the firing rate modulation of a neuron, we use a  
1381 cross-validated model comparison approach, and a greedy forward selection of features. First, we compare  
1382 a fitted 'baseline' model where the spikes are simply generated by a Poisson process with a constant rate  
1383 to 45 fitted models, that include only one feature. The comparison is cross-validated, such that we fit the  
1384 model on 90% of the data and evaluate on 10% held-out data (with 3 skips, i.e., we split the data in 30  
1385 chunks, fit to 27 and evaluate on 3). To compare each of the one-feature models to the baseline model, we  
1386 calculate the increase in log-likelihood of the test data, given the fitted one-feature models (relative to the  
1387 baseline model), across all 10 permutations of the 10-fold cross validation. We select the best candidate  
1388 feature (defined as the one with the highest average increase in log-likelihood, across the 10 folds), and  
1389 check if the increase in log-likelihood is significant by performing a one-sided Wilcoxon signed-rank test,  
1390 with a criterion of  $p < 0.05$ . If the best candidate feature is significant, we add that feature to a library of  
1391 features that we consider significant for that neuron. If we have the number of spikes in the spike train,  $\bar{n}$ ,  
1392 and the maximum-likelihood fitted rate is  $\bar{\lambda}(\hat{c})$ , then the log-likelihood increase,  $\Delta\mathcal{L}$  (in bits/spike) is:

1393 
$$\mathcal{L}_{\text{model}} = \left( \sum_i \lambda_i - n_i \log(\lambda_i) + \log(n_i!) \right) / \sum_i n_i$$

1394 
$$\mathcal{L}_{\text{constant}} = \left( \sum_i \langle n \rangle - n_i \log(\langle n \rangle) + \log(n_i!) \right) / \sum_i n_i$$

1395 
$$\Delta\mathcal{L} = -\log(2) \cdot (\mathcal{L}_{\text{model}} - \mathcal{L}_{\text{constant}})$$

1396 For all ( $N > 1$ )-feature models (two features, three features, etc.), we use the same approach: We fit all  
1397 possible models that add one more feature to the library of  $N-1$  significant features (all tuning curves of  
1398 all features in the library are re-fit every time), we select the best candidate feature, and use a one-sided

1399 Wilcoxon signed-rank test between a model with N features and a model with N-1 features to determine  
1400 if that candidate feature is significant and should be added to the library. If the one-sided Wilcoxon signed-  
1401 rank test is not significant at  $p < 0.05$ , we stop the search for new features to add to the library.

1402

1403 ***Population structure analysis***

1404 The Euler diagram in Figure 8d was drawn in R using the eulerr package<sup>96</sup>. The network co-encoding  
1405 graph shown in Figure 8e was drawn in the Kamada-Kawai projection<sup>88</sup> (the distance between nodes ap-  
1406 proximate their graph-theoretical distance), using the NetworkX python package<sup>97</sup>.
